# Supplementary material for: Myosin inhibition partially rescues the myofiber proteome in X-linked myotubular myopathy
Source: JCI journal article supplement (doi:10.1172/jci.insight.194868), 2025-11-04

**Supplementary file for:**

**Myosin inhibition partially rescues the muscle fibre molecular phenotype in X-linked myotubular myopathy**

Elise Gerlach Melhedegaard, Fanny Rostedt, Charlotte Gineste, Robert A.E. Seaborne, Hannah F. Dugdale, Vladimir Belhac, Edmar Zanoteli, Michael W. Lawlor, David L. Mack, Carina Wallgren-Pettersson, Anthony L. Hessel, Heinz Jungbluth, Jocelyn Laporte, Yoshihiko Saito, Ichizo Nishino, Julien Ochala, Jenni Laitila

This document contains:  
Supplemental Tables 1 to 5;  
Supplemental Figure 1.

**Supplemental Table 1: Fibre type proportions in the samples used for canine proteomics.**

|           | Percentage myosin |          |          |          | Fibre type    |
|-----------|-------------------|----------|----------|----------|---------------|
|           | Myosin 2          | Myosin-1 | Myosin-7 | Myosin-4 |               |
| Control 1 | 64.26             | 5.66     | 26.77    | 3.31     | Mixed slow/2A |
| Control 2 | 58.62             | 5.14     | 33.49    | 2.76     | Mixed slow/2A |
| Control 3 | 45.63             | 2.19     | 51.25    | 0.93     | Mixed slow/2A |
| Control 4 | 66.61             | 2.32     | 30.63    | 0.43     | Mixed slow/2A |
| Control 5 | 44.04             | 1.87     | 53.56    | 0.53     | Mixed slow/2A |
| Control 6 | 91.07             | 2.66     | 5.86     | 0.41     | 2A            |
| XLMTM 1   | 55.78             | 1.76     | 41.86    | 0.60     | Mixed slow/2A |
| XLMTM 2   | 75.49             | 4.48     | 17.64    | 2.39     | Mixed slow/2A |
| XLMTM 3   | 45.00             | 2.60     | 51.18    | 1.22     | Mixed slow/2A |
| XLMTM 4   | 51.62             | 6.63     | 36.83    | 4.91     | Mixed slow/2A |
| XLMTM 5   | 33.17             | 2.90     | 62.07    | 1.87     | Mixed slow/2A |
| XLMTM 6   | 26.75             | 3.85     | 66.67    | 2.72     | Mixed slow/2A |

**Supplemental Table 2: Canine global untargeted proteomics analysis. Significant upregulation in each experimental group determined based on  $p < 0.05$ .**

| <i>Protein name</i>                          | <i>Uniprot Accession</i> | <i>Gene name</i> | <i>Gene ID</i> | <i>Control</i> | <i>XLMTM</i> | <i>Log<sub>2</sub> FC</i> | <i>p-value</i> | <i>q value</i> |
|----------------------------------------------|--------------------------|------------------|----------------|----------------|--------------|---------------------------|----------------|----------------|
| <b>Upregulated in XLMTM</b>                  |                          |                  |                |                |              |                           |                |                |
| GLOBIN domain-containing protein             | AOA8C0P013               |                  |                | 51.667         | 894.500      | 4.479                     | < 0.001        | < 0.001        |
| Cofilin 2                                    | AOA8I3MEH0               | CFL2             | 490649         | 321.833        | 4489.444     | 3.867                     | < 0.001        | < 0.001        |
| Alpha-crystallin B chain                     | AOA8C0Q8G4               | CRYAB            | 479441         | 1854.111       | 21608.778    | 3.527                     | < 0.001        | < 0.001        |
| Cell cycle and apoptosis regulator 2         | AOA8I3P633               | CCAR2            | 486122         | 345.944        | 2314.556     | 3.189                     | < 0.001        | < 0.001        |
| Heat shock protein family A (Hsp70) member 2 | AOA8C0P9Q2               | HSPA2            | 480355         | 848.222        | 6761.000     | 3.157                     | < 0.001        | < 0.001        |
| LIM and cysteine rich domains 1              | AOA8I3RW10               | LMCD1            | 476545         | 207.167        | 1601.167     | 3.028                     | < 0.001        | < 0.001        |
| Myosin light chain 6B                        | AOA8I3RUW5               | MYL6             | 606992         | 262.667        | 1753.444     | 2.798                     | < 0.001        | < 0.001        |
| Ankyrin repeat domain 2                      | AOA8C0PJR4               | ANKRD2           | 486822         | 300.722        | 2191.111     | 2.768                     | < 0.001        | < 0.001        |
| Collagen type VI alpha 3 chain               | AOA8C0P5R9               | COL6A3           | 403582         | 212.333        | 631.278      | 2.748                     | < 0.001        | < 0.001        |
| Tubulin alpha chain                          | AOA8C0MZ87               | TUBA4A           | 478918         | 1032.611       | 6596.722     | 2.670                     | < 0.001        | < 0.001        |
| Tubulin beta chain                           | AOA8I3MY05               | TUBB             | 474830         | 581.222        | 3489.167     | 2.640                     | < 0.001        | < 0.001        |
| Peroxiredoxin-1                              | AOA8I3PG86               | PRDX1            | 475375         | 1018.278       | 6070.389     | 2.559                     | < 0.001        | < 0.001        |
| ATP-dependent 6-phosphofructokinase          | AOA8I3P7P5               | PFKL             | 487797         | 39.333         | 146.833      | 2.552                     | < 0.001        | < 0.001        |

|                                                            |            |              |           |          |           |       |         |         |
|------------------------------------------------------------|------------|--------------|-----------|----------|-----------|-------|---------|---------|
| SHSP domain-containing protein                             | AOA8I3MEJ0 | HSPB2        | 611362    | 114.722  | 300.111   | 2.439 | < 0.001 | < 0.001 |
| Adenylate kinase isoenzyme 1                               | AOA8C0SVP6 | AK1          | 480712    | 360.667  | 1907.833  | 2.424 | < 0.001 | < 0.001 |
| Collagen type VI alpha 1 chain                             | AOA8I3S7Z3 | COL6A1       | 403668    | 219.056  | 705.722   | 2.423 | < 0.001 | < 0.001 |
| Myozenin 2 OS=Canis lupus familiaris                       | AOA8I3Q871 | MYOZ2        | 478524    | 414.389  | 1934.611  | 2.370 | < 0.001 | < 0.001 |
| Heat shock protein beta-1                                  | AOA8C0MMM4 | HSPB1        | 403979    | 773.222  | 4103.111  | 2.333 | < 0.001 | < 0.001 |
| Heat shock protein 90 alpha family class B member 1        | AOA8C0S8X9 | HSP90AB1     | 474919    | 558.056  | 2629.500  | 2.324 | < 0.001 | < 0.001 |
| Glyceraldehyde-3-phosphate dehydrogenase (phosphorylating) | AOA8C0T2F6 | LOC119877479 | 119877479 | 3685.944 | 15063.944 | 2.209 | < 0.001 | < 0.001 |
| Heat shock protein 90 alpha family class A member 1        | AOA8C0M536 | HSP90AA1     | 480438    | 175.167  | 744.889   | 2.195 | < 0.001 | < 0.001 |
| Transitional endoplasmic reticulum ATPase                  | AOA8I3MWF5 | VCP          | 481590    | 222.833  | 930.056   | 2.154 | < 0.001 | < 0.001 |
| Tripartite motif-containing protein 72                     | AOA8C0S8N8 | TRIM72       | 489927    | 1581.556 | 6161.500  | 2.141 | < 0.001 | < 0.001 |
| Elongation factor 1-alpha                                  | AOA8C0TTJ0 | EEF1A2       | 612521    | 2809.000 | 10767.722 | 2.140 | < 0.001 | < 0.001 |
| Uncharacterized protein                                    | AOA8C0PB66 |              |           | 1897.611 | 7019.556  | 2.092 | < 0.001 | < 0.001 |
| Peptidylprolyl isomerase                                   | AOA8I3MMG4 | FKBP3        | 480306    | 107.444  | 379.333   | 1.977 | < 0.001 | < 0.001 |
| Eukaryotic translation elongation factor 2                 | AOA8I3RV50 | EEF2         | 476744    | 59.944   | 260.833   | 1.956 | < 0.001 | < 0.001 |
| Kelch like family member 40                                | AOA8C0NDE6 | KLHL40       | 485616    | 590.778  | 2136.333  | 1.896 | < 0.001 | < 0.001 |
| Annexin                                                    | AOA8C0Z1Y0 | ANXA1        |           | 630.500  | 1967.222  | 1.806 | < 0.001 | < 0.001 |

|                                                                              |            |         |          |          |          |       |       |         |
|------------------------------------------------------------------------------|------------|---------|----------|----------|----------|-------|-------|---------|
| Four and a half LIM domains 1                                                | AOA8C0NME4 | FHL1    | 492162   | 3848.889 | 11786.72 | 1.721 | <     | < 0.001 |
|                                                                              |            |         |          |          | 2        |       | 0.001 |         |
| Heterogeneous nuclear ribonucleoprotein D like                               | AOA8C0NIB3 | HNRNPDL | 476976   | 59.722   | 162.111  | 1.694 | <     | < 0.001 |
|                                                                              |            |         |          |          |          |       | 0.001 |         |
| Heat shock protein family A (Hsp70) member 8                                 | AOA8C0SFV4 | HSPA8   | 479406   | 5859.167 | 16522.11 | 1.690 | <     | < 0.001 |
|                                                                              |            |         |          |          | 1        |       | 0.001 |         |
| Voltage-dependent anion-selective channel protein 1                          | AOA8C0N523 | VDAC1   | 474681   | 303.222  | 890.722  | 1.640 | <     | < 0.001 |
|                                                                              |            |         |          |          |          |       | 0.001 |         |
| Fructose-bisphosphate aldolase                                               | AOA8C0Z329 | ALDOC   | 480622   | 208.944  | 527.556  | 1.634 | <     | < 0.001 |
|                                                                              |            |         |          |          |          |       | 0.001 |         |
| Heat shock protein family B (small) member 6                                 | AOA8C0THZ2 | HSPB6   | 484574   | 495.278  | 1453.722 | 1.622 | 0.002 | 0.004   |
| Tripartite motif containing 13                                               | AOA8C0RNH1 | TRIM13  | 11267892 | 124.389  | 326.611  | 1.607 | <     | < 0.001 |
|                                                                              |            |         | 6        |          |          |       | 0.001 |         |
| Pyruvate kinase                                                              | AOA8C0NP15 | PARP6   | 478358   | 1311.944 | 3389.556 | 1.594 | <     | < 0.001 |
|                                                                              |            |         |          |          |          |       | 0.001 |         |
| Vimentin                                                                     | AOA8C0N8E3 | VIM     | 477991   | 643.722  | 1905.444 | 1.557 | <     | < 0.001 |
|                                                                              |            |         |          |          |          |       | 0.001 |         |
| Carbonic anhydrase                                                           | AOA8I3P452 | CA3     | 487032   | 3574.944 | 8805.333 | 1.550 | <     | < 0.001 |
|                                                                              |            |         |          |          |          |       | 0.001 |         |
| Phosphoglycerate kinase                                                      | AOA8C0Z0K4 | PGK1    | 480964   | 1190.611 | 2856.111 | 1.527 | <     | < 0.001 |
|                                                                              |            |         |          |          |          |       | 0.001 |         |
| Bridging integrator 1                                                        | AOA8I3S7B1 | BIN1    | 483870   | 3439.000 | 8735.722 | 1.486 | <     | < 0.001 |
|                                                                              |            |         |          |          |          |       | 0.001 |         |
| Tyrosine 3-monooxygenase/tryptophan 5-monooxygenase activation protein gamma | AOA8I3MT06 | YWHAG   | 489818   | 655.000  | 1526.778 | 1.475 | <     | < 0.001 |
|                                                                              |            |         |          |          |          |       | 0.001 |         |
| Lamin A/C                                                                    | AOA8I3NEK0 | LMNA    | 480124   | 1481.333 | 4030.389 | 1.467 | <     | < 0.001 |
|                                                                              |            |         |          |          |          |       | 0.001 |         |
| Fructose-bisphosphate aldolase                                               | AOA8C0R9Z8 | ALDOA   | 11264004 | 10192.61 | 22737.77 | 1.442 | <     | < 0.001 |
|                                                                              |            |         | 8        | 1        | 8        |       | 0.001 |         |
| Protein unc-45 homolog B                                                     | AOA8C0NYA3 | UNC45B  | 480606   | 29.278   | 64.556   | 1.416 | <     | < 0.001 |
|                                                                              |            |         |          |          |          |       | 0.001 |         |
| Bridging integrator 1                                                        | AOA8C0Q7P9 |         |          | 46.500   | 109.000  | 1.410 | <     | 0.002   |
|                                                                              |            |         |          |          |          |       | 0.001 |         |

|                                                           |            |           |          |          |          |       |       |         |
|-----------------------------------------------------------|------------|-----------|----------|----------|----------|-------|-------|---------|
| Protein-arginine deiminase                                | AOA8C0Q899 |           |          | 49.889   | 146.722  | 1.409 | 0.002 | 0.003   |
| Apolipoprotein B mRNA editing enzyme catalytic subunit 2  | AOA8C0MII3 | APOBEC2   | 481788   | 712.722  | 1682.167 | 1.322 | <     | < 0.001 |
| Creatine kinase                                           | AOA8C0S5U1 | CKM       | 476435   | 11214.11 | 23111.61 | 1.311 | <     | < 0.001 |
|                                                           |            |           |          | 1        | 1        |       | 0.001 |         |
| Heterogeneous nuclear ribonucleoproteins A2/B1            | AOA8C0M9Q4 | HNRNPA2B1 | 475260   | 338.833  | 708.500  | 1.256 | <     | < 0.001 |
|                                                           |            |           |          |          |          |       | 0.001 |         |
| Mono-ADP ribosylhydrolase 1                               | AOA8C0RGX8 | MACROD1   | 612142   | 89.000   | 207.611  | 1.250 | <     | < 0.001 |
|                                                           |            |           |          |          |          |       | 0.001 |         |
| La ribonucleoprotein 1, translational regulator           | AOA8I3MY08 | LARP1     | 612929   | 682.333  | 1367.222 | 1.244 | <     | 0.003   |
|                                                           |            |           |          |          |          |       | 0.001 |         |
| Uncharacterized protein                                   | AOA8C0MRK1 |           |          | 583.000  | 815.167  | 1.209 | 0.046 | 0.049   |
| Cysteine and glycine rich protein 3                       | AOA8I3NXE1 | CSRP3     | 610946   | 740.556  | 1374.611 | 1.199 | 0.002 | 0.005   |
| PDZ and LIM domain 3                                      | AOA8C0SAM4 | PDLIM3    | 482907   | 1589.278 | 3462.778 | 1.159 | <     | < 0.001 |
|                                                           |            |           |          |          |          |       | 0.001 |         |
| Protein kinase C and casein kinase substrate in neurons 3 | AOA8C0PLA9 | PACSIN3   | 475984   | 549.111  | 1116.444 | 1.132 | <     | < 0.001 |
|                                                           |            |           |          |          |          |       | 0.001 |         |
| Myosin light chain 3                                      | AOA8I3NHZ9 | MYL3      | 476644   | 3118.722 | 6236.000 | 1.124 | 0.002 | 0.005   |
| Acetyl-CoA acetyltransferase 1                            | AOA8I3MQ37 | ACAT1     | 489421   | 664.389  | 1036.167 | 1.026 | 0.012 | 0.016   |
| Albumin                                                   | AOA8C0NV01 | ALB       | 403550   | 1255.556 | 2016.667 | 1.018 | 0.002 | 0.005   |
| SET and MYND domain containing 1                          | AOA8C0MJD1 | SMYD1     | 475758   | 408.000  | 831.111  | 0.995 | 0.006 | 0.009   |
| Semaphorin 4D                                             | AOA8C0PKB4 | SEMA4D    | 476350   | 431.944  | 799.444  | 0.977 | <     | 0.002   |
|                                                           |            |           |          |          |          |       | 0.001 |         |
| Myotilin                                                  | AOA8C0SBP2 | MYOT      | 10085569 | 2671.056 | 4828.889 | 0.966 | <     | < 0.001 |
|                                                           |            |           | 3        |          |          |       | 0.001 |         |
| Heparan sulfate proteoglycan 2                            | AOA8C0RAX9 | HSPG2     | 403440   | 103.389  | 155.389  | 0.945 | 0.038 | 0.042   |
| Sodium/potassium-transporting ATPase subunit beta         | AOA8C0PQV9 | ATP1B1    | 403966   | 352.944  | 656.611  | 0.944 | <     | < 0.001 |
|                                                           |            |           |          |          |          |       | 0.001 |         |
| Troponin I1, slow skeletal type                           | AOA8C0LX10 | TNNI1     | 10068516 | 5456.722 | 9319.944 | 0.940 | <     | 0.001   |
|                                                           |            |           | 0        |          |          |       | 0.001 |         |
| Keratin 9                                                 | AOA8C0P7U8 | KRT9      |          | 2024.833 | 3622.667 | 0.911 | <     | 0.003   |
|                                                           |            |           |          |          |          |       | 0.001 |         |

|                                                             |            |        |          |          |          |       |       |         |
|-------------------------------------------------------------|------------|--------|----------|----------|----------|-------|-------|---------|
| Myosin light chain 2                                        | AOA8I3Q4A5 | MYL2   | 403614   | 8492.056 | 13456.22 | 0.909 | 0.001 | 0.003   |
| Elongation factor Tu                                        | AOA8C0PZN9 | TUFM   | 479796   | 505.611  | 903.722  | 0.879 | <     | < 0.001 |
| Calsequestrin                                               | AOA8C0SA33 | CASQ2  | 483134   | 954.389  | 1944.667 | 0.846 | 0.003 | 0.005   |
| Potassium voltage-gated channel subfamily H member 3        | AOA8CONZI8 | KCNH3  | 11267829 | 676.944  | 1141.389 | 0.841 | 0.011 | 0.014   |
| Medium-chain specific acyl-CoA dehydrogenase, mitochondrial | AOA8I3RRX0 | ACADM  | 490207   | 254.778  | 451.222  | 0.816 | 0.010 | 0.014   |
| Thioredoxin domain-containing protein                       | AOA8C0SJW6 |        |          | 498.389  | 766.333  | 0.788 | 0.008 | 0.012   |
| Creatine kinase                                             | AOA8I3PNS0 | CKMT2  | 479163   | 2988.833 | 4554.389 | 0.787 | 0.003 | 0.005   |
| Caveolin                                                    | AOA8COMMY6 | CAV1   | 403980   | 903.556  | 1449.556 | 0.776 | <     | < 0.001 |
| Kelch like family member 41                                 | AOA8COMH92 | KLHL41 | 478784   | 5631.611 | 9276.944 | 0.773 | <     | < 0.001 |
| Calcium-transporting ATPase                                 | AOA8I3QPB8 | ATP2C1 | 477066   | 450.278  | 678.278  | 0.769 | <     | 0.003   |
| Collagen type IV alpha 1 chain                              | AOA8I3PA57 | COL4A1 | 403496   | 140.389  | 170.111  | 0.768 | 0.030 | 0.034   |
| Carnitine O-acetyltransferase                               | AOA8I3PPI0 | CRAT   | 491304   | 610.833  | 947.722  | 0.723 | 0.003 | 0.006   |
| SH3 and multiple ankyrin repeat domains 1                   | AOA8I3NPZ0 | SHANK1 | 484359   | 1340.889 | 2097.000 | 0.720 | 0.006 | 0.010   |
| Filamin C                                                   | AOA8C0SKH6 | FLNC   | 482266   | 8080.778 | 12045.50 | 0.704 | 0.034 | 0.038   |
| 78 kDa glucose-regulated protein                            | AOA8COMIT4 | HSPA5  | 480726   | 1164.056 | 1803.222 | 0.700 | 0.004 | 0.007   |
| Alpha-1,4 glucan phosphorylase                              | AOA8C0RCX9 | PYGM   | 611078   | 18560.72 | 25991.16 | 0.649 | 0.001 | 0.003   |
| Histone H2B                                                 | AOA8C0TVM6 | H2BC1  | 488252   | 3901.167 | 5491.167 | 0.626 | 0.003 | 0.005   |
| GLOBIN domain-containing protein                            | AOA8COMKR1 |        |          | 903.778  | 1218.167 | 0.619 | 0.024 | 0.029   |
| Citrate synthase                                            | AOA8I3N6V8 | CS     | 474403   | 2660.111 | 3735.333 | 0.614 | 0.003 | 0.006   |
| Keratin, type II cytoskeletal 1                             | AOA8C0TQZ9 | KRT1   | 444857   | 1257.500 | 1917.111 | 0.604 | 0.034 | 0.038   |
| Family with sequence similarity 53 member B                 | AOA8C0TAC6 | FAM53B | 611311   | 325.000  | 528.000  | 0.589 | 0.030 | 0.034   |
| Sarcoglycan alpha                                           | AOA8I3NCD7 | SGCA   | 609265   | 178.056  | 249.778  | 0.567 | 0.008 | 0.012   |
| PDZ and LIM domain 5                                        | AOA8I3PE25 | PDLIM5 | 478482   | 3615.778 | 4623.722 | 0.519 | 0.026 | 0.031   |

|                               |            |        |        |         |         |       |       |       |
|-------------------------------|------------|--------|--------|---------|---------|-------|-------|-------|
| Four and a half LIM domains 3 | AOA8I3QAY6 | FHL3   | 608080 | 639.389 | 852.778 | 0.502 | 0.047 | 0.049 |
| NADH-cytochrome b5 reductase  | AOA8C0M4J8 | CYB5R1 | 606823 | 150.722 | 209.389 | 0.460 | 0.011 | 0.014 |

---

**Downregulated in XLMTM (WT)**

---

|                                                                      |            |        |          |          |          |        |       |         |
|----------------------------------------------------------------------|------------|--------|----------|----------|----------|--------|-------|---------|
| Atypical kinase COQ8A, mitochondrial                                 | AOA8C0S931 | COQ8A  | 480108   | 1411.611 | 563.667  | -1.303 | <     | < 0.001 |
|                                                                      |            |        |          |          |          |        | 0.001 |         |
| RNA pseudouridine synthase D4                                        | AOA8C0LUJ0 | RPUSD4 | 489295   | 283.278  | 119.722  | -1.109 | 0.003 | 0.006   |
| Acetyltransferase component of pyruvate dehydrogenase complex        | AOA8C0NAN7 | DLAT   | 489406   | 347.167  | 177.444  | -1.075 | 0.027 | 0.032   |
| Pyruvate dehydrogenase E1 component subunit beta                     | AOA8C0RNN4 | PDHB   | 476574   | 2308.722 | 1074.500 | -1.015 | <     | < 0.001 |
|                                                                      |            |        |          |          |          |        | 0.001 |         |
| Pyruvate dehydrogenase E1 component subunit alpha                    | AOA8C0T0M1 | PDHA1  | 11986838 | 3438.667 | 1623.000 | -1.011 | <     | < 0.001 |
|                                                                      |            |        | 2        |          |          |        | 0.001 |         |
| Uncharacterized protein                                              | AOA8C0TKG5 |        |          | 9911.722 | 4977.556 | -0.987 | <     | < 0.001 |
|                                                                      |            |        |          |          |          |        | 0.001 |         |
| Creatine kinase                                                      | AOA8I3MET3 |        |          | 962.833  | 428.500  | -0.968 | 0.005 | 0.008   |
| Myosin-8                                                             | AOA8C0LVV3 | MYH8   | 489503   | 697.167  | 337.056  | -0.959 | 0.018 | 0.023   |
| NADH dehydrogenase [ubiquinone] flavoprotein 1, mitochondrial        | AOA8I3N636 | NDUFV1 | 476004   | 1197.111 | 571.722  | -0.933 | 0.010 | 0.013   |
| Tropomyosin 1                                                        | AOA8C0MHC6 | TPM1   | 478332   | 6269.167 | 3331.333 | -0.915 | <     | < 0.001 |
|                                                                      |            |        |          |          |          |        | 0.001 |         |
| NADH dehydrogenase [ubiquinone] iron-sulfur protein 7, mitochondrial | AOA8C0QGW9 | NDUFS7 | 476754   | 573.889  | 282.889  | -0.901 | <     | < 0.001 |
|                                                                      |            |        |          |          |          |        | 0.001 |         |
| NADH dehydrogenase [ubiquinone] iron-sulfur protein 3, mitochondrial | AOA8C0SSI5 | NDUFS3 | 475978   | 1832.222 | 890.944  | -0.900 | <     | < 0.001 |
|                                                                      |            |        |          |          |          |        | 0.001 |         |
| Myosin binding protein C, fast type                                  | AOA8C0YW53 | MYBPC2 | 476404   | 2466.944 | 1199.056 | -0.894 | 0.009 | 0.013   |
| Proton-translocating NAD(P)(+) transhydrogenase                      | AOA8C0S4T3 | NNT    | 479342   | 2617.167 | 1377.944 | -0.862 | <     | < 0.001 |
|                                                                      |            |        |          |          |          |        | 0.001 |         |
| Ubiquitin like modifier activating enzyme 6                          | AOA8I3N8D3 | UBA6   | 475160   | 2379.889 | 1117.722 | -0.859 | 0.012 | 0.016   |
| Long-chain-fatty-acid--CoA ligase                                    | AOA8C0YXC2 |        |          | 1252.778 | 687.278  | -0.858 | 0.013 | 0.017   |
| Myosin-2                                                             | AOA8C0T2B0 | MYH2   | 608242   | 89223.11 | 45629.50 | -0.803 | 0.024 | 0.029   |
|                                                                      |            |        |          | 1        | 0        |        |       |         |

|                                                                                                                  |            |          |          |          |          |        |       |         |
|------------------------------------------------------------------------------------------------------------------|------------|----------|----------|----------|----------|--------|-------|---------|
| Myosin-8                                                                                                         | AOA8I3MIP2 | MYH8     | 403808   | 4269.167 | 2333.389 | -0.795 | 0.036 | 0.039   |
| Cytochrome b-c1 complex subunit Rieske, mitochondrial                                                            | AOA8I3MI67 | UQCRFS1  | 476503   | 2596.278 | 1357.389 | -0.778 | 0.003 | 0.006   |
| Solute carrier family 25 member 12                                                                               | AOA8C0TZ22 | SLC25A12 | 478798   | 2900.278 | 1600.389 | -0.756 | 0.005 | 0.009   |
| Troponin I2, fast skeletal type                                                                                  | AOA8C0TUY8 | TNNI2    | 475995   | 6126.056 | 3397.056 | -0.744 | <     | 0.003   |
|                                                                                                                  |            |          |          |          |          |        | 0.001 |         |
| Synaptophysin like 2                                                                                             | AOA8C0N379 | SYPL2    | 611827   | 1054.722 | 587.278  | -0.729 | <     | 0.001   |
|                                                                                                                  |            |          |          |          |          |        | 0.001 |         |
| ATP synthase subunit alpha                                                                                       | AOA8C0QKG4 | ATP5F1A  | 480149   | 29519.88 | 16818.55 | -0.713 | <     | < 0.001 |
|                                                                                                                  |            |          |          | 9        | 6        |        | 0.001 |         |
| Calcium-transporting ATPase                                                                                      | AOA8I3MN74 | ATP2A1   | 479797   | 26915.44 | 14753.66 | -0.708 | 0.001 | 0.003   |
|                                                                                                                  |            |          |          | 4        | 7        |        |       |         |
| Dihydrolipoyllysine-residue succinyltransferase component of 2-oxoglutarate dehydrogenase complex, mitochondrial | AOA8C0NT07 |          |          | 1044.500 | 643.222  | -0.643 | 0.004 | 0.006   |
| ATP synthase subunit O, mitochondrial                                                                            | AOA8I3PXG0 | ATP5PO   | 478410   | 1382.778 | 815.944  | -0.627 | 0.010 | 0.014   |
| Ubiquinol-cytochrome c reductase core protein 2                                                                  | AOA8C0P0Z5 | UQCRC2   | 479815   | 2966.833 | 1797.778 | -0.614 | 0.001 | 0.003   |
| ATP synthase subunit beta                                                                                        | AOA8I3NCH2 | ATP5F1B  | 403669   | 15358.44 | 9273.389 | -0.607 | 0.002 | 0.005   |
|                                                                                                                  |            |          |          | 4        |          |        |       |         |
| Helicase with zinc finger                                                                                        | AOA8I3PSR6 | HELZ     | 490907   | 1557.500 | 987.556  | -0.607 | 0.007 | 0.011   |
| Myosin light chain, phosphorylatable, fast skeletal muscle                                                       | AOA8C0SLJ7 | MYLPF    | 479772   | 17330.05 | 11274.16 | -0.607 | 0.012 | 0.016   |
|                                                                                                                  |            |          |          | 6        | 7        |        |       |         |
| NDUFA4 mitochondrial complex associated                                                                          | AOA8C0NZR2 | NDUFA4   | 10085633 | 3360.167 | 2047.556 | -0.583 | 0.004 | 0.007   |
|                                                                                                                  |            |          |          | 4        |          |        |       |         |
| Calsequestrin                                                                                                    | AOA8C0NG78 |          |          | 7128.444 | 4613.278 | -0.580 | 0.005 | 0.009   |
| Actin alpha 1, skeletal muscle                                                                                   | AOA8C0N2I3 | ACTA1    | 488984   | 45303.22 | 29954.72 | -0.580 | <     | < 0.001 |
|                                                                                                                  |            |          |          | 2        | 2        |        | 0.001 |         |
| Aspartate aminotransferase                                                                                       | AOA8C0LW07 | GOT2     | 478103   | 3553.167 | 2198.278 | -0.564 | 0.018 | 0.022   |
| Cytochrome c oxidase subunit 2                                                                                   | AOA172R529 | COX2     | 804479   | 1422.611 | 854.333  | -0.563 | 0.022 | 0.027   |
| MICOS complex subunit MIC60                                                                                      | AOA8I3RXK0 | IMMT     | 475764   | 2943.056 | 1942.833 | -0.517 | 0.010 | 0.014   |
| Ubiquitin protein ligase E3 component n-recogin 4                                                                | AOA8C0MQV8 | UBR4     | 478211   | 1728.278 | 1193.667 | -0.504 | 0.028 | 0.033   |
| Phosphopyruvate hydratase                                                                                        | AOA8I3PWZ2 | ENO1     | 479597   | 3933.333 | 2517.333 | -0.496 | 0.031 | 0.035   |
| Ubiquinol-cytochrome c reductase core protein 1                                                                  | AOA8I3QCC4 | UQCRC1   | 608455   | 5498.556 | 3598.944 | -0.492 | 0.015 | 0.019   |

|                                        |            |          |        |          |          |        |       |       |
|----------------------------------------|------------|----------|--------|----------|----------|--------|-------|-------|
| Acyl-CoA dehydrogenase very long chain | AOA8I3P5V9 | ACADVL   | 489463 | 1919.278 | 1272.167 | -0.484 | 0.044 | 0.047 |
| ATP synthase subunit gamma             | AOA8C0LQA1 | ATP5F1C  | 478009 | 2473.444 | 1670.500 | -0.467 | 0.025 | 0.030 |
| Uncharacterized protein                | AOA8C0T8P6 |          |        | 192.889  | 127.722  | -0.460 | 0.016 | 0.020 |
| Myosin light chain 1                   | AOA8I3P3S6 | MYL1     | 478896 | 7622.500 | 5524.778 | -0.443 | 0.035 | 0.038 |
| Transmembrane serine protease 13       | AOA8I3MN50 | TMPRSS13 | 610827 | 1087.111 | 718.444  | -0.442 | 0.038 | 0.042 |
| Tropomyosin 2                          | AOA8C0N098 | TPM2     | 481598 | 28946.66 | 22250.88 | -0.418 | 0.013 | 0.017 |
|                                        |            |          |        | 7        | 9        |        |       |       |
| Sarcalumenin                           | AOA8C0SNB7 | SRL      | 490030 | 6991.000 | 4937.722 | -0.396 | 0.020 | 0.025 |
| Actinin alpha 2                        | AOA8C0MXP0 | ACTN2    | 479191 | 32734.00 | 24701.88 | -0.390 | 0.006 | 0.009 |
|                                        |            |          |        | 0        | 9        |        |       |       |

---

**No significant differences between WT and XLMTM**

---

|                                                    |            |        |  |          |          |       |       |       |
|----------------------------------------------------|------------|--------|--|----------|----------|-------|-------|-------|
| Malate dehydrogenase                               | AOA8C0Q1T7 | MDH1   |  | 248.222  | 486.778  | 1.190 | 0.077 | 0.077 |
| Xin actin binding repeat containing 1              | AOA8I3QSZ5 | XIRP1  |  | 186.611  | 315.000  | 0.811 | 0.066 | 0.067 |
| Nephrocystin 3                                     | AOA8C0Z478 | NPHP3  |  | 181.556  | 356.000  | 0.799 | 0.077 | 0.077 |
| Desmoplakin                                        | AOA8I3P212 | DSP    |  | 210.056  | 313.000  | 0.660 | 0.084 | 0.081 |
| L-lactate dehydrogenase                            | AOA8C0PCN9 | LDHB   |  | 2285.500 | 3134.944 | 0.660 | 0.065 | 0.067 |
| Elongation factor 1-gamma                          | AOA8I3NCW4 | TUT1   |  | 989.444  | 1280.167 | 0.650 | 0.077 | 0.076 |
| Sodium/potassium-transporting ATPase subunit alpha | AOA8C0NKC6 | ATP1A4 |  | 202.000  | 312.500  | 0.641 | 0.110 | 0.108 |
| Junction plakoglobin                               | AOA8I3NL10 | JUP    |  | 198.444  | 291.111  | 0.606 | 0.055 | 0.056 |
| Keratin 18                                         | AOA8I3PJ84 | KRT18  |  | 996.889  | 1546.889 | 0.589 | 0.156 | 0.152 |
| Triosephosphate isomerase                          | AOA8I3PRM7 | TPI1   |  | 1775.556 | 2215.278 | 0.576 | 0.141 | 0.138 |
| Myosin-4                                           | AOA8C0M1G3 | MYH4   |  | 2000.389 | 2261.056 | 0.543 | 0.272 | 0.262 |
| Tropomyosin 4 delta                                | AOA0N9JE84 | Tpm4   |  | 1147.222 | 1414.222 | 0.517 | 0.179 | 0.174 |
| PDZ and LIM domain 5                               | AOA8C0PEX2 | PDLIM5 |  | 3111.889 | 4029.667 | 0.507 | 0.086 | 0.083 |
| Golgin A3                                          | AOA8I3S9G9 | GOLGA3 |  | 977.111  | 1472.833 | 0.505 | 0.076 | 0.076 |
| EH domain containing 2                             | AOA8I3MKL5 | EHD2   |  | 128.167  | 160.944  | 0.493 | 0.223 | 0.213 |
| Uncharacterized protein                            | AOA8I3Q055 | PRKX   |  | 86.056   | 107.500  | 0.483 | 0.078 | 0.076 |
| Heat shock protein family B (small) member 7       | AOA8C0RWS8 | HSPB7  |  | 121.722  | 157.333  | 0.471 | 0.192 | 0.186 |
| Synaptopodin 2 OS=Canis lupus familiaris           | AOA8I3QWM0 | SYNP   |  | 395.889  | 519.389  | 0.462 | 0.081 | 0.080 |

|                                                                          |            |           |          |          |       |       |       |
|--------------------------------------------------------------------------|------------|-----------|----------|----------|-------|-------|-------|
| Stress-70 protein, mitochondrial                                         | AOA8C0SP21 | HSPA9     | 778.389  | 967.611  | 0.421 | 0.066 | 0.067 |
| 60 kDa heat shock protein, mitochondrial                                 | AOA8C0TC09 | HSPD1     | 1455.667 | 1836.556 | 0.410 | 0.157 | 0.152 |
| Malate dehydrogenase                                                     | AOA8C0TCL8 |           | 3968.778 | 4866.111 | 0.400 | 0.060 | 0.062 |
| Histone H4                                                               | F2Z4N2     | H4C9      | 2531.778 | 2998.167 | 0.370 | 0.077 | 0.076 |
| H1.0 linker histone                                                      | AOA8I3RUA8 | H1-0      | 502.944  | 564.222  | 0.337 | 0.199 | 0.192 |
| Histone H3                                                               | AOA8C0LQ69 | LOC475916 | 3341.667 | 4019.944 | 0.337 | 0.053 | 0.055 |
| Tropomyosin 3                                                            | AOA8I3S1D8 | TPM3      | 14271.33 | 16020.27 | 0.324 | 0.158 | 0.152 |
|                                                                          |            |           | 3        | 8        |       |       |       |
| Chromosome 2 open reading frame 72                                       | AOA8I3PEA8 | C2orf72   | 81.444   | 92.722   | 0.302 | 0.267 | 0.257 |
| Succinate dehydrogenase [ubiquinone] iron-sulfur subunit, mitochondrial  | AOA8C0RFS0 | SDHB      | 1020.000 | 1157.722 | 0.287 | 0.233 | 0.223 |
| Keratin 15                                                               | AOA8I3NXE8 | KRT15     | 1019.222 | 1017.667 | 0.287 | 0.323 | 0.311 |
| Phosphopyruvate hydratase                                                | AOA8I3N5K2 | ENO3      | 12130.61 | 12740.11 | 0.272 | 0.280 | 0.270 |
|                                                                          |            |           | 1        | 1        |       |       |       |
| Actinin alpha 3                                                          | AOA8I3NN24 | ACTN3     | 4676.056 | 4996.389 | 0.260 | 0.254 | 0.246 |
| Uncharacterized protein                                                  | AOA8I3PTP5 | ECHS1     | 122.778  | 141.333  | 0.259 | 0.211 | 0.203 |
| Isocitrate dehydrogenase (NADP(+))                                       | AOA8C0PSM3 | IDH1      | 7104.333 | 7883.167 | 0.255 | 0.185 | 0.178 |
| Tropomodulin 4                                                           | AOA8I3PE86 | TMOD4     | 761.778  | 844.944  | 0.226 | 0.415 | 0.401 |
| Keratin, type II cytoskeletal 1                                          | AOA8C0P4P0 | KRT1      | 8134.833 | 9840.111 | 0.222 | 0.291 | 0.277 |
| Myosin-7                                                                 | AOA8I3MJC8 | MYH7      | 41239.66 | 40326.66 | 0.217 | 0.504 | 0.483 |
|                                                                          |            |           | 7        | 7        |       |       |       |
| Dysferlin OS=Canis lupus familiaris                                      | AOA8I3P9A7 | LOC491973 | 171.389  | 162.778  | 0.189 | 0.625 | 0.596 |
| Reticulon                                                                | AOA8I3NRF3 | RTN4      | 626.667  | 655.167  | 0.187 | 0.537 | 0.512 |
| Glycosylphosphatidylinositol anchor attachment 1                         | AOA8I3N3K0 | GPAA1     | 1018.222 | 1018.111 | 0.181 | 0.610 | 0.585 |
| PRA1 family protein                                                      | AOA8I3NDE1 | ARL6IP5   | 838.444  | 843.500  | 0.173 | 0.466 | 0.450 |
| EF-hand domain-containing protein                                        | AOA8C0SD34 | SELENON   | 213.667  | 215.944  | 0.157 | 0.488 | 0.470 |
| Apoptosis inducing factor mitochondria associated 1                      | AOA8C0TDQ6 | AIFM1     | 415.944  | 446.500  | 0.148 | 0.482 | 0.466 |
| LIM domain binding 3                                                     | AOA8C0M2K9 | LDB3      | 5315.333 | 5593.056 | 0.129 | 0.501 | 0.482 |
| Cardiac titin (Fragment)                                                 | Q7YRF5     | TTN       | 9726.889 | 4576.444 | 0.111 | 0.830 | 0.828 |
| Succinate dehydrogenase [ubiquinone] flavoprotein subunit, mitochondrial | AOA8I3P4H0 | SDHA      | 2642.056 | 2692.889 | 0.103 | 0.506 | 0.481 |

|                                                           |            |          |          |          |        |       |       |
|-----------------------------------------------------------|------------|----------|----------|----------|--------|-------|-------|
| Nebulin                                                   | AOA8I3N6H5 | NEB      | 14190.33 | 7548.222 | 0.048  | 0.920 | 0.914 |
|                                                           |            |          | 3        |          |        |       |       |
| Glycogenin 1                                              | AOA8I3PGI9 | GYG1     | 422.444  | 415.667  | 0.015  | 0.950 | 0.943 |
| Voltage-dependent anion-selective channel protein 2       | AOA8C0P0B2 | VDAC2    | 3820.833 | 3522.722 | 0.002  | 0.993 | 0.992 |
| Leucine rich repeat and coiled-coil centrosomal protein 1 | AOA8C0TD23 | LRRCC1   | 293.500  | 247.056  | -0.025 | 0.927 | 0.919 |
| Calreticulin                                              | AOA8C0P5H0 | CALR     | 342.111  | 317.222  | -0.028 | 0.917 | 0.915 |
| Keratin, type II cytoskeletal 2 epidermal                 | AOA8C0RQ12 | KRT2     | 5211.833 | 5212.556 | -0.036 | 0.917 | 0.919 |
| Cytochrome c1                                             | AOA8C0RTK9 | CYC1     | 1027.556 | 897.056  | -0.048 | 0.823 | 0.823 |
| Epoxide hydrolase 1                                       | AOA8C0SEZ0 | EPHX1    | 277.389  | 252.722  | -0.050 | 0.842 | 0.839 |
| Fumarate hydratase, mitochondrial                         | AOA8C0Q033 | FH       | 495.000  | 443.944  | -0.063 | 0.915 | 0.920 |
| Keratin 75                                                | AOA8I3PNP3 | KRT6A    | 458.444  | 377.722  | -0.075 | 0.863 | 0.860 |
| Keratin, type I cytoskeletal 10                           | AOA8I3NL87 | KRT10    | 10378.88 | 10249.11 | -0.105 | 0.683 | 0.659 |
|                                                           |            |          | 9        | 1        |        |       |       |
| Dihydrolipoyl dehydrogenase                               | AOA8I3PTV9 | DLD      | 2603.778 | 2188.556 | -0.119 | 0.556 | 0.528 |
| Nipsnap homolog 2                                         | AOA8I3NCW1 | NIPSNAP2 | 4564.167 | 3842.500 | -0.139 | 0.456 | 0.441 |
| Calsarcin 2                                               | Q1AG03     | MYOZ1    | 3080.000 | 2660.444 | -0.151 | 0.528 | 0.503 |
| Calcium-transporting ATPase                               | B6CAN1     | ATP2A2   | 8057.333 | 6425.667 | -0.159 | 0.480 | 0.465 |
| IF rod domain-containing protein                          | AOA8C0SYM7 | KRT18    | 2373.444 | 2276.278 | -0.162 | 0.611 | 0.584 |
| Oxoglutarate dehydrogenase (succinyl-transferring)        | AOA8I3NKB5 | OGDH     | 1042.056 | 875.333  | -0.171 | 0.363 | 0.351 |
| Superoxide dismutase [Mn], mitochondrial                  | AOA8C0Z4V9 | SOD2     | 731.222  | 622.833  | -0.172 | 0.408 | 0.395 |
| Capping actin protein of muscle Z-line subunit alpha 2    | AOA8C0SW56 | CAPZA2   | 227.222  | 198.722  | -0.172 | 0.156 | 0.152 |
| Voltage-dependent anion-selective channel protein 3       | AOA8C0Q760 | VDAC3    | 2569.167 | 2146.167 | -0.188 | 0.373 | 0.358 |
| Amine oxidase                                             | AOA8I3PYC1 | AOC1     | 83.111   | 64.833   | -0.192 | 0.341 | 0.328 |
| Myosin-1                                                  | AOA8I3MN85 | MYH1     | 4790.667 | 3603.389 | -0.231 | 0.541 | 0.514 |
| Solute carrier family 25 member 11                        | AOA8C0P6K8 | SLC25A11 | 853.722  | 683.500  | -0.238 | 0.335 | 0.323 |
| Aconitate hydratase, mitochondrial                        | AOA8I3NYC8 | ACO2     | 1747.778 | 1398.444 | -0.241 | 0.453 | 0.440 |
| ADP/ATP translocase                                       | AOA8C0NE13 | SLC25A4  | 8731.556 | 7040.556 | -0.263 | 0.129 | 0.126 |
| Uncharacterized protein                                   | AOA8C0PAT5 |          | 735.278  | 273.167  | -0.290 | 0.654 | 0.628 |
| Cytochrome b-c1 complex subunit 8                         | AOA8I3NJC6 | UQCRCQ   | 873.167  | 637.056  | -0.294 | 0.281 | 0.269 |
| Uncharacterized protein                                   | AOA8I3Q2S8 | HADHB    | 2596.556 | 1972.833 | -0.302 | 0.151 | 0.147 |
| Phosphate carrier protein, mitochondrial                  | AOA8I3Q073 | SLC25A3  | 2940.278 | 2219.167 | -0.321 | 0.143 | 0.139 |

|                                                           |            |             |          |          |        |       |       |
|-----------------------------------------------------------|------------|-------------|----------|----------|--------|-------|-------|
| Uncharacterized protein                                   | AOA8C0T6T0 |             | 406.667  | 145.556  | -0.337 | 0.594 | 0.569 |
| Myosin binding protein C, slow type                       | AOA8C0SR77 | MYBPC1      | 27574.50 | 21386.61 | -0.345 | 0.167 | 0.161 |
|                                                           |            |             | 0        | 1        |        |       |       |
| Voltage-dependent anion-selective channel protein 1       | AOA8C0QBR5 | VDAC1       | 11948.44 | 8343.667 | -0.355 | 0.118 | 0.115 |
|                                                           |            |             | 4        |          |        |       |       |
| Drebrin 1                                                 | AOA8C0M2Y5 |             | 104.889  | 79.667   | -0.377 | 0.283 | 0.271 |
| Cytochrome c oxidase subunit 5A, mitochondrial            | AOA8C0MTN1 | COX5A       | 263.833  | 177.056  | -0.379 | 0.423 | 0.407 |
| Enoyl-CoA hydratase                                       | AOA8C0QB72 | ECHS1       | 3368.222 | 2574.667 | -0.392 | 0.049 | 0.052 |
| Ubiquinone biosynthesis monooxygenase COQ6, mitochondrial | AOA8I3NFA6 | COQ6        | 445.167  | 317.056  | -0.409 | 0.123 | 0.121 |
| Cytochrome c oxidase subunit 6C                           | F1PKU9     |             | 1470.056 | 957.167  | -0.419 | 0.106 | 0.104 |
| Troponin C2, fast skeletal type                           | AOA8I3NNU2 | TNNC2       | 1170.500 | 818.111  | -0.425 | 0.422 | 0.408 |
| Troponin T, fast skeletal muscle                          | AOA8C0Z6J3 | TNNT3       | 11662.83 | 7576.222 | -0.430 | 0.061 | 0.063 |
|                                                           |            |             | 3        |          |        |       |       |
| REC8 meiotic recombination protein                        | AOA8C0NDC6 | REC8        | 1314.722 | 915.556  | -0.430 | 0.107 | 0.104 |
| Glycogen [starch] synthase                                | AOA8I3MKP1 | GYS1        | 336.778  | 243.500  | -0.456 | 0.049 | 0.052 |
| Uncharacterized protein                                   | AOA8C0P4P8 |             | 1329.611 | 493.556  | -0.467 | 0.505 | 0.482 |
| Titin                                                     | AOA8I3S7V6 | TTN         | 52294.11 | 18427.77 | -0.518 | 0.370 | 0.357 |
|                                                           |            |             | 1        | 8        |        |       |       |
| ATP synthase subunit b                                    | AOA8I3MFn6 | LOC11987223 | 1135.889 | 700.444  | -0.523 | 0.260 | 0.252 |
|                                                           |            | 0           |          |          |        |       |       |
| Alpha-cardiac myosin heavy chain (Fragment)               | Q076A1     | MYH1        | 562.167  | 347.444  | -0.560 | 0.140 | 0.138 |
| Prohibitin                                                | AOA8I3PW80 | PHB2        | 664.889  | 463.500  | -0.569 | 0.134 | 0.131 |
| Ryanodine receptor 1                                      | AOA8C0SJC2 | RYR1        | 344.278  | 200.944  | -0.658 | 0.216 | 0.208 |
| Protein disulfide-isomerase                               | AOA8C0RUF5 |             | 426.500  | 259.944  | -0.696 | 0.219 | 0.210 |
| Myosin phosphatase Rho interacting protein                | AOA8C0M1X4 | MPRIP       | 152.500  | 62.278   | -0.795 | 0.062 | 0.063 |

|            |            |       |         |         |        |       |       |
|------------|------------|-------|---------|---------|--------|-------|-------|
| Myomesin 1 | AOA8C0Q7V0 | MYOM1 | 986.500 | 409.833 | -0.845 | 0.205 | 0.198 |
|------------|------------|-------|---------|---------|--------|-------|-------|

---

**Proteins excluded from downstream analysis following filtering for >1 unique peptide**

---

|                                                                                |  |        |          |          |        |  |  |
|--------------------------------------------------------------------------------|--|--------|----------|----------|--------|--|--|
| GLOBIN domain-containing protein                                               |  |        | 269.333  | 6382.333 | 4.564  |  |  |
| Glyceraldehyde-3-phosphate dehydrogenase                                       |  |        | 123.944  | 1839.111 | 3.878  |  |  |
| Decorin                                                                        |  | DCN    | 707.611  | 6179.944 | 3.038  |  |  |
| UTP--glucose-1-phosphate uridylyltransferase                                   |  |        | 308.056  | 2310.000 | 2.900  |  |  |
| ATP-dependent 6-phosphofructokinase                                            |  |        | 479.167  | 3140.167 | 2.840  |  |  |
| Annexin                                                                        |  |        | 205.222  | 1144.833 | 2.543  |  |  |
| Tubulin beta chain                                                             |  |        | 90.778   | 438.389  | 2.391  |  |  |
| IRF tryptophan pentad repeat domain-containing protein                         |  |        | 409.611  | 817.778  | 1.288  |  |  |
| Muscle-restricted coiled-coil protein                                          |  |        | 135.444  | 287.167  | 1.184  |  |  |
| Glutathione peroxidase                                                         |  |        | 205.278  | 388.222  | 1.135  |  |  |
| Tyrosine 3-monooxygenase/tryptophan 5-monooxygenase activation protein epsilon |  | YWHAE  | 184.778  | 381.889  | 1.065  |  |  |
| Protein phosphatase 6 regulatory subunit 1                                     |  | PPP6R1 | 6612.333 | 9648.944 | 0.792  |  |  |
| Histone H2A                                                                    |  |        | 1102.611 | 1653.778 | 0.695  |  |  |
| Keratin, type II cytoskeletal 1                                                |  |        | 4811.333 | 7691.278 | 0.594  |  |  |
| Ubiquitin B                                                                    |  |        | 2014.222 | 2974.722 | 0.568  |  |  |
| Keratin 15                                                                     |  |        | 3555.722 | 4110.778 | 0.377  |  |  |
| Malate dehydrogenase, mitochondrial                                            |  |        | 1058.833 | 1272.222 | 0.354  |  |  |
| Ubiquinone biosynthesis protein                                                |  |        | 280.056  | 324.000  | 0.097  |  |  |
| Desmin                                                                         |  | DES    | 7888.944 | 7705.167 | 0.075  |  |  |
| Galectin 4                                                                     |  | LGALS4 | 981.722  | 895.722  | -0.024 |  |  |
| ATP synthase subunit d, mitochondrial                                          |  |        | 411.056  | 279.833  | -0.408 |  |  |
| Poly [ADP-ribose] polymerase                                                   |  |        | 801.667  | 586.778  | -0.437 |  |  |

|                                                                 |        |          |          |        |
|-----------------------------------------------------------------|--------|----------|----------|--------|
| Prohibitin                                                      |        | 798.000  | 561.278  | -0.438 |
| Myosin light chain 4                                            | MYL4   | 248.889  | 160.667  | -0.537 |
| Myomesin 2                                                      | MYOM2  | 2035.056 | 1304.722 | -0.582 |
| Cyclic AMP-responsive element-binding protein 5                 | CREB5  | 337.444  | 204.000  | -0.725 |
| SAMM50 sorting and assembly machinery component                 | SAMM50 | 168.667  | 91.667   | -0.863 |
| Bacteriophage Mu transposase                                    |        | 642.889  | 244.778  | -0.983 |
| NADH-ubiquinone oxidoreductase 75 kDa subunit,<br>mitochondrial |        | 1444.667 | 639.667  | -1.059 |
| Aspartate ammonia-lyase                                         |        | 619.000  | 127.611  | -1.396 |
| Transmembrane anterior posterior transformation 1               | TAPT1  | 879.389  | 350.000  | -1.481 |
| SRC kinase signaling inhibitor 1                                | SRCIN1 | 315.944  | 105.444  | -1.586 |

**Supplemental Table 3: Mouse global untargeted proteomics analysis where WT are compared to Mtm1<sup>y/-</sup> tissue.**

| protein_identifier | log2FC     | padj       | direction    |
|--------------------|------------|------------|--------------|
| Slco5a1            | -4.4971556 | 0.00980885 | Mtm1y/-_DOWN |
| Myom1              | -3.4220411 | 5.35E-05   | Mtm1y/-_DOWN |
| Nt5c1a             | -3.3825882 | 0.01266985 | Mtm1y/-_DOWN |
| Bdh1               | -2.8579899 | 0.00098519 | Mtm1y/-_DOWN |
| Cdk5rap1           | -2.8137621 | 0.03747051 | Mtm1y/-_DOWN |
| Myl2               | -2.7990391 | 0.0002145  | Mtm1y/-_DOWN |
| Zfp174             | -2.7457755 | 0.00076649 | Mtm1y/-_DOWN |
| Myl2               | -2.6580965 | 0.00083054 | Mtm1y/-_DOWN |
| Neb                | -2.6343166 | 0.00631841 | Mtm1y/-_DOWN |
| Acot11             | -2.3699961 | 0.01070932 | Mtm1y/-_DOWN |
| Syp                | -2.1520762 | 0.00438691 | Mtm1y/-_DOWN |
| Gm5965             | -2.0891687 | 0.03161721 | Mtm1y/-_DOWN |
| Myh7               | -2.0158427 | 0.00261359 | Mtm1y/-_DOWN |
| Smc1a              | -2.0121742 | 0.00124746 | Mtm1y/-_DOWN |
| Csnk1g3            | -1.9415694 | 0.00648976 | Mtm1y/-_DOWN |
| Tnnt1              | -1.9281731 | 0.01347128 | Mtm1y/-_DOWN |
| Tnni1              | -1.8926769 | 0.01502101 | Mtm1y/-_DOWN |
| Tnnc1              | -1.8511421 | 0.03517873 | Mtm1y/-_DOWN |
| Lsmem1             | -1.8392715 | 0.0012277  | Mtm1y/-_DOWN |
| Myh6               | -1.8005634 | 0.00258289 | Mtm1y/-_DOWN |
| Plin3              | -1.7550238 | 0.02677832 | Mtm1y/-_DOWN |
| Mtm1               | -1.7476727 | 0.0190986  | Mtm1y/-_DOWN |
| Atp2a2             | -1.6974457 | 0.00754365 | Mtm1y/-_DOWN |
| Grb14              | -1.6254353 | 0.00188855 | Mtm1y/-_DOWN |
| Myl3               | -1.6048301 | 0.00060035 | Mtm1y/-_DOWN |
| Ldb3               | -1.6016961 | 0.00936449 | Mtm1y/-_DOWN |
| Plin5              | -1.5310877 | 0.03275795 | Mtm1y/-_DOWN |
| Tpm3               | -1.51635   | 0.00563316 | Mtm1y/-_DOWN |
| Myl3               | -1.4532971 | 0.00941481 | Mtm1y/-_DOWN |

|          |            |            |              |
|----------|------------|------------|--------------|
| Cct6b    | -1.4438694 | 0.01585332 | Mtm1y/-_DOWN |
| Slc7a8   | -1.42483   | 0.04878888 | Mtm1y/-_DOWN |
| Aqp7     | -1.3639355 | 0.03642137 | Mtm1y/-_DOWN |
| Dhrs7c   | -1.3466438 | 0.00746357 | Mtm1y/-_DOWN |
| Myoz2    | -1.3281864 | 0.00703313 | Mtm1y/-_DOWN |
| Klhl34   | -1.3189392 | 0.00179896 | Mtm1y/-_DOWN |
| Phkg1    | -1.2977696 | 0.00266057 | Mtm1y/-_DOWN |
| Lpl      | -1.288851  | 0.00307235 | Mtm1y/-_DOWN |
| Rilpl1   | -1.2683185 | 0.04789589 | Mtm1y/-_DOWN |
| Lgals8   | -1.2620488 | 0.03017859 | Mtm1y/-_DOWN |
| Ank1     | -1.2438215 | 0.00983719 | Mtm1y/-_DOWN |
| Map2k6   | -1.2381652 | 0.00031804 | Mtm1y/-_DOWN |
| Slc25a31 | -1.2275851 | 0.02644254 | Mtm1y/-_DOWN |
| Mtfp1    | -1.2193863 | 0.03109448 | Mtm1y/-_DOWN |
| Xdh      | -1.210088  | 0.02436459 | Mtm1y/-_DOWN |
| Prxl2a   | -1.2079959 | 0.00150238 | Mtm1y/-_DOWN |
| Mgst1    | -1.1987734 | 0.01282    | Mtm1y/-_DOWN |
| Stac3    | -1.1846555 | 0.00188855 | Mtm1y/-_DOWN |
| Scn4b    | -1.1819339 | 0.02759232 | Mtm1y/-_DOWN |
| Slc16a1  | -1.1774143 | 0.00398026 | Mtm1y/-_DOWN |
| Atp2a2   | -1.1336931 | 0.00824063 | Mtm1y/-_DOWN |
| Phkb     | -1.1332015 | 0.00667589 | Mtm1y/-_DOWN |
| Myh15    | -1.1122945 | 0.00474145 | Mtm1y/-_DOWN |
| Tcap     | -1.1013206 | 0.02519805 | Mtm1y/-_DOWN |
| Kcnma1   | -1.0988591 | 0.02801474 | Mtm1y/-_DOWN |
| Col6a6   | -1.0983418 | 0.02552206 | Mtm1y/-_DOWN |
| Lsmem2   | -1.0894271 | 0.0075836  | Mtm1y/-_DOWN |
| Prodh    | -1.0769179 | 0.00188855 | Mtm1y/-_DOWN |
| Actn2    | -1.0637551 | 0.01107467 | Mtm1y/-_DOWN |
| Lrrc38   | -1.0594082 | 0.04881921 | Mtm1y/-_DOWN |
| Pdzd7    | -1.058359  | 0.01241385 | Mtm1y/-_DOWN |
| Ca4      | -1.0508103 | 0.04285161 | Mtm1y/-_DOWN |

|          |            |            |              |
|----------|------------|------------|--------------|
| Oplah    | -1.0467629 | 0.0050427  | Mtm1y/-_DOWN |
| Wdr37    | -1.0144477 | 0.00987415 | Mtm1y/-_DOWN |
| Maob     | -1.0096578 | 0.01952776 | Mtm1y/-_DOWN |
| Mavs     | -0.9963139 | 0.00565348 | Mtm1y/-_DOWN |
| Smim14   | -0.9905263 | 0.00140564 | Mtm1y/-_DOWN |
| Bsg      | -0.9790118 | 0.00624149 | Mtm1y/-_DOWN |
| Ampd1    | -0.9544666 | 0.01652729 | Mtm1y/-_DOWN |
| Alpl     | -0.9524957 | 0.01761818 | Mtm1y/-_DOWN |
| Fkbp11   | -0.9440608 | 0.00085218 | Mtm1y/-_DOWN |
| Actg2    | -0.9288642 | 0.00444848 | Mtm1y/-_DOWN |
| Slc41a3  | -0.9259535 | 0.01628312 | Mtm1y/-_DOWN |
| Kcna7    | -0.9241852 | 0.02325362 | Mtm1y/-_DOWN |
| Phka1    | -0.9147551 | 0.00424525 | Mtm1y/-_DOWN |
| Fn3k     | -0.9059406 | 0.01516973 | Mtm1y/-_DOWN |
| Cpt1b    | -0.890843  | 0.03161721 | Mtm1y/-_DOWN |
| Myl6b    | -0.869989  | 0.03453911 | Mtm1y/-_DOWN |
| Dglucy   | -0.8475622 | 0.02519805 | Mtm1y/-_DOWN |
| Tinagl1  | -0.8439794 | 0.0434862  | Mtm1y/-_DOWN |
| Mief2    | -0.8410208 | 0.00245829 | Mtm1y/-_DOWN |
| Nnt      | -0.8326608 | 0.01512894 | Mtm1y/-_DOWN |
| Cd300lg  | -0.8312631 | 0.02065652 | Mtm1y/-_DOWN |
| Rap1gds1 | -0.829861  | 0.00664888 | Mtm1y/-_DOWN |
| Capza2   | -0.8275198 | 0.00337862 | Mtm1y/-_DOWN |
| Ldhb     | -0.8271974 | 0.00230344 | Mtm1y/-_DOWN |
| Slc9a2   | -0.8216618 | 0.0479298  | Mtm1y/-_DOWN |
| Ugp2     | -0.8198993 | 0.02193987 | Mtm1y/-_DOWN |
| Cacna1s  | -0.8191976 | 0.01107467 | Mtm1y/-_DOWN |
| Slc27a1  | -0.8069292 | 0.00802581 | Mtm1y/-_DOWN |
| Palm     | -0.8054752 | 0.02233243 | Mtm1y/-_DOWN |
| Capzb    | -0.8014722 | 0.00444537 | Mtm1y/-_DOWN |
| Acsl1    | -0.799577  | 0.00342091 | Mtm1y/-_DOWN |
| Smpd13b  | -0.7961056 | 0.0208926  | Mtm1y/-_DOWN |

|               |            |            |              |
|---------------|------------|------------|--------------|
| Gtdc1         | -0.7950002 | 0.01321529 | Mtm1y/-_DOWN |
| Fkbp4         | -0.7871133 | 0.00596027 | Mtm1y/-_DOWN |
| Gapvd1        | -0.7664231 | 0.0127899  | Mtm1y/-_DOWN |
| Uqcrb         | -0.7662508 | 0.02175898 | Mtm1y/-_DOWN |
| Usp15         | -0.7634363 | 0.01072829 | Mtm1y/-_DOWN |
| Elp2          | -0.7621125 | 0.04680339 | Mtm1y/-_DOWN |
| Cacna2d1      | -0.7620838 | 0.00824063 | Mtm1y/-_DOWN |
| Vwa1          | -0.7568835 | 0.04496746 | Mtm1y/-_DOWN |
| Dnm1l         | -0.7486175 | 0.02807068 | Mtm1y/-_DOWN |
| Pank4         | -0.7484132 | 0.00378676 | Mtm1y/-_DOWN |
| Gbe1          | -0.7467047 | 0.00205117 | Mtm1y/-_DOWN |
| Etfdh         | -0.7417084 | 0.03902682 | Mtm1y/-_DOWN |
| Ephx2         | -0.7357365 | 0.02965228 | Mtm1y/-_DOWN |
| Lrrc30        | -0.7314226 | 0.00795739 | Mtm1y/-_DOWN |
| Hspa12b       | -0.7260181 | 0.03249497 | Mtm1y/-_DOWN |
| Atp1b1        | -0.7232071 | 0.00593809 | Mtm1y/-_DOWN |
| Myorg         | -0.7228583 | 0.02519805 | Mtm1y/-_DOWN |
| Acad11        | -0.7156507 | 0.02325362 | Mtm1y/-_DOWN |
| Pdlim5        | -0.7117954 | 0.03098856 | Mtm1y/-_DOWN |
| Cyp2u1        | -0.6990236 | 0.03588869 | Mtm1y/-_DOWN |
| Ndufb7        | -0.6758244 | 0.02807068 | Mtm1y/-_DOWN |
| Mpc2          | -0.669505  | 0.01435037 | Mtm1y/-_DOWN |
| Ndufb1        | -0.6564545 | 0.03423471 | Mtm1y/-_DOWN |
| Cox5a         | -0.6374559 | 0.02984739 | Mtm1y/-_DOWN |
| Nceh1         | -0.6371438 | 0.03590477 | Mtm1y/-_DOWN |
| Actbl2        | -0.6350979 | 0.03406678 | Mtm1y/-_DOWN |
| Gsk3a         | -0.6320213 | 0.02902819 | Mtm1y/-_DOWN |
| 2310061104Rik | -0.6298578 | 0.03327076 | Mtm1y/-_DOWN |
| Mdh1          | -0.6206448 | 0.02393804 | Mtm1y/-_DOWN |
| Cops2         | -0.6204817 | 0.01154283 | Mtm1y/-_DOWN |
| Ndufb9        | -0.6140771 | 0.03042937 | Mtm1y/-_DOWN |
| Pdlim5        | -0.6137377 | 0.02319024 | Mtm1y/-_DOWN |

|         |            |            |              |
|---------|------------|------------|--------------|
| Slc25a4 | -0.6056508 | 0.00898342 | Mtm1y/-_DOWN |
| Ndufs7  | -0.5890884 | 0.00575434 | Mtm1y/-_DOWN |
| Ndufb6  | -0.589003  | 0.02407467 | Mtm1y/-_DOWN |
| Stat5b  | -0.5861982 | 0.00872229 | Mtm1y/-_DOWN |
| Cul5    | -0.5858432 | 0.04089487 | Mtm1y/-_DOWN |
| Atp5mk  | -0.5779841 | 0.03988155 | Mtm1y/-_DOWN |
| Capn3   | -0.5757643 | 0.00691789 | Mtm1y/-_DOWN |
| Meioc   | -0.573237  | 0.03249497 | Mtm1y/-_DOWN |
| Hint3   | -0.5538198 | 0.0212068  | Mtm1y/-_DOWN |
| Map2k3  | -0.5519407 | 0.02242091 | Mtm1y/-_DOWN |
| Alad    | -0.5498577 | 0.04870637 | Mtm1y/-_DOWN |
| Rnf123  | -0.5485533 | 0.00188855 | Mtm1y/-_DOWN |
| Capza1  | -0.5412544 | 0.03429237 | Mtm1y/-_DOWN |
| Apoc1   | -0.5337019 | 0.0310512  | Mtm1y/-_DOWN |
| Atp5pd  | -0.5251265 | 0.03653964 | Mtm1y/-_DOWN |
| Ehd1    | -0.5241869 | 0.02519805 | Mtm1y/-_DOWN |
| Mtx2    | -0.5157799 | 0.02644254 | Mtm1y/-_DOWN |
| Acta1   | -0.5114012 | 0.02902819 | Mtm1y/-_DOWN |
| Rps6ka5 | -0.5081962 | 0.03251192 | Mtm1y/-_DOWN |
| Ndufs8  | -0.5046032 | 0.01155792 | Mtm1y/-_DOWN |
| Napepld | -0.4933085 | 0.03653964 | Mtm1y/-_DOWN |
| Farsb   | -0.4904556 | 0.022668   | Mtm1y/-_DOWN |
| Trabd   | -0.488119  | 0.01792204 | Mtm1y/-_DOWN |
| Ndufa5  | -0.4862214 | 0.01241385 | Mtm1y/-_DOWN |
| Ndufs3  | -0.4754747 | 0.01233932 | Mtm1y/-_DOWN |
| Tmem38a | -0.4682636 | 0.01072829 | Mtm1y/-_DOWN |
| Cnksr1  | -0.4657445 | 0.02065466 | Mtm1y/-_DOWN |
| Blvra   | -0.4612491 | 0.01187909 | Mtm1y/-_DOWN |
| Ppm1b   | -0.4557202 | 0.03687779 | Mtm1y/-_DOWN |
| Ndufv2  | -0.4552573 | 0.01952776 | Mtm1y/-_DOWN |
| Mgst3   | -0.4515841 | 0.00595728 | Mtm1y/-_DOWN |
| Mpc1    | -0.4414786 | 0.0468836  | Mtm1y/-_DOWN |

|          |            |            |              |
|----------|------------|------------|--------------|
| Mcf2l    | -0.4391877 | 0.03041892 | Mtm1y/-_DOWN |
| Cad      | -0.4262587 | 0.02580807 | Mtm1y/-_DOWN |
| Abcc9    | -0.4171627 | 0.00677077 | Mtm1y/-_DOWN |
| Ndufb8   | -0.4022156 | 0.02738138 | Mtm1y/-_DOWN |
| Ppp2r1a  | -0.4000918 | 0.03098856 | Mtm1y/-_DOWN |
| Ppp2r5d  | -0.396389  | 0.02325362 | Mtm1y/-_DOWN |
| Abcc1    | -0.3948523 | 0.0364574  | Mtm1y/-_DOWN |
| Adss1    | -0.3819175 | 0.0440039  | Mtm1y/-_DOWN |
| Prkg1    | -0.3762541 | 0.02701048 | Mtm1y/-_DOWN |
| Mylk2    | -0.3624977 | 0.03098856 | Mtm1y/-_DOWN |
| Chp1     | -0.3617066 | 0.02519805 | Mtm1y/-_DOWN |
| Ppp2r5a  | -0.3017107 | 0.0440039  | Mtm1y/-_DOWN |
| Mtarc2   | -0.2930185 | 0.01301243 | Mtm1y/-_DOWN |
| Pigs     | 0.29492002 | 0.03139357 | Mtm1y/-_UP   |
| Cdipt    | 0.29611137 | 0.02228774 | Mtm1y/-_UP   |
| Psap     | 0.29734089 | 0.02030661 | Mtm1y/-_UP   |
| Rhoa     | 0.29946299 | 0.01654574 | Mtm1y/-_UP   |
| Dhrs1    | 0.30871657 | 0.04201775 | Mtm1y/-_UP   |
| Hnrnpk   | 0.32148665 | 0.01525645 | Mtm1y/-_UP   |
| Lmf2     | 0.32244534 | 0.03307256 | Mtm1y/-_UP   |
| Ddost    | 0.32618764 | 0.04807866 | Mtm1y/-_UP   |
| Atp6v0a2 | 0.32648598 | 0.02012876 | Mtm1y/-_UP   |
| Foxred1  | 0.33667435 | 0.03271331 | Mtm1y/-_UP   |
| Gdi2     | 0.34294463 | 0.02984739 | Mtm1y/-_UP   |
| Alg14    | 0.34468796 | 0.02984739 | Mtm1y/-_UP   |
| Cutc     | 0.345878   | 0.02677832 | Mtm1y/-_UP   |
| Ganab    | 0.34619102 | 0.03421316 | Mtm1y/-_UP   |
| Ppp3r1   | 0.34679555 | 0.03990608 | Mtm1y/-_UP   |
| Lnpep    | 0.34754598 | 0.01969491 | Mtm1y/-_UP   |
| Mybbp1a  | 0.36162803 | 0.01792204 | Mtm1y/-_UP   |
| Hspa5    | 0.36494613 | 0.0471571  | Mtm1y/-_UP   |
| Dysf     | 0.37169503 | 0.04435749 | Mtm1y/-_UP   |

|          |            |            |            |
|----------|------------|------------|------------|
| Mtpap    | 0.3803257  | 0.03139357 | Mtm1y/-_UP |
| Gpaa1    | 0.38362953 | 0.00294434 | Mtm1y/-_UP |
| Pigk     | 0.38427461 | 0.02495705 | Mtm1y/-_UP |
| Rpn2     | 0.38541327 | 0.04540771 | Mtm1y/-_UP |
| Hnrnpl   | 0.3930309  | 0.04143961 | Mtm1y/-_UP |
| Prkcsh   | 0.39351721 | 0.03057597 | Mtm1y/-_UP |
| Ppa1     | 0.39684297 | 0.03944954 | Mtm1y/-_UP |
| Cox15    | 0.40092403 | 0.02325362 | Mtm1y/-_UP |
| Eif3b    | 0.41775781 | 0.01241385 | Mtm1y/-_UP |
| Memo1    | 0.42245052 | 0.017533   | Mtm1y/-_UP |
| Fn3krp   | 0.42309067 | 0.01233932 | Mtm1y/-_UP |
| Prep     | 0.42466769 | 0.01585332 | Mtm1y/-_UP |
| Snrpd3   | 0.43357677 | 0.01665419 | Mtm1y/-_UP |
| Clcn3    | 0.43523132 | 0.03650526 | Mtm1y/-_UP |
| Hnrnpu   | 0.43775181 | 0.04750106 | Mtm1y/-_UP |
| Kng1     | 0.44023853 | 0.01932822 | Mtm1y/-_UP |
| Aldh3a2  | 0.44113032 | 0.02519805 | Mtm1y/-_UP |
| Rab2a    | 0.4415347  | 0.02228774 | Mtm1y/-_UP |
| Eef2     | 0.44590195 | 0.01641653 | Mtm1y/-_UP |
| Smurf1   | 0.45313662 | 0.04580151 | Mtm1y/-_UP |
| Uggt1    | 0.45806582 | 0.01051887 | Mtm1y/-_UP |
| Cyp20a1  | 0.45931111 | 0.03406678 | Mtm1y/-_UP |
| Ube2n    | 0.46171696 | 0.04822213 | Mtm1y/-_UP |
| Rab10    | 0.46227484 | 0.01321549 | Mtm1y/-_UP |
| Tppp3    | 0.46451458 | 0.01975291 | Mtm1y/-_UP |
| Gm20431  | 0.46512869 | 0.01385077 | Mtm1y/-_UP |
| Apex1    | 0.46533707 | 0.02475125 | Mtm1y/-_UP |
| Hnrnpul2 | 0.46790952 | 0.02152821 | Mtm1y/-_UP |
| Lamp2    | 0.47336251 | 0.02325362 | Mtm1y/-_UP |
| Afg3l1   | 0.47370509 | 0.00732615 | Mtm1y/-_UP |
| Ncln     | 0.47421653 | 0.00517678 | Mtm1y/-_UP |
| Ipo4     | 0.47452044 | 0.01753494 | Mtm1y/-_UP |

|          |            |            |            |
|----------|------------|------------|------------|
| Lamp1    | 0.47480407 | 0.03307256 | Mtm1y/-_UP |
| Tsn      | 0.47709071 | 0.02243489 | Mtm1y/-_UP |
| Ldb3     | 0.4812227  | 0.03037666 | Mtm1y/-_UP |
| Msra     | 0.48567136 | 0.03800795 | Mtm1y/-_UP |
| Tmx1     | 0.48780331 | 0.04416551 | Mtm1y/-_UP |
| Colgalt1 | 0.48980096 | 0.01031267 | Mtm1y/-_UP |
| Tmed2    | 0.49066749 | 0.03012449 | Mtm1y/-_UP |
| Ero1a    | 0.49095495 | 0.01540352 | Mtm1y/-_UP |
| Esd      | 0.49503612 | 0.02910157 | Mtm1y/-_UP |
| Gna13    | 0.4952995  | 0.04158156 | Mtm1y/-_UP |
| Ociad1   | 0.49951225 | 0.01261577 | Mtm1y/-_UP |
| Acs13    | 0.50066346 | 0.0422763  | Mtm1y/-_UP |
| Exoc6    | 0.50555961 | 0.04031388 | Mtm1y/-_UP |
| Extl1    | 0.50849285 | 0.02950399 | Mtm1y/-_UP |
| Slc35b1  | 0.50913953 | 0.02807068 | Mtm1y/-_UP |
| Tmed9    | 0.51111563 | 0.00529698 | Mtm1y/-_UP |
| Ap2a2    | 0.51551667 | 0.0360459  | Mtm1y/-_UP |
| Slc12a4  | 0.51553672 | 0.04626722 | Mtm1y/-_UP |
| Tmed4    | 0.51601589 | 0.00802581 | Mtm1y/-_UP |
| Ube2l3   | 0.51677599 | 0.03653964 | Mtm1y/-_UP |
| Ykt6     | 0.51972121 | 0.045226   | Mtm1y/-_UP |
| Rab11b   | 0.52049743 | 0.01643177 | Mtm1y/-_UP |
| Sec61b   | 0.52171563 | 0.0253275  | Mtm1y/-_UP |
| Nudt21   | 0.52831697 | 0.01107467 | Mtm1y/-_UP |
| Nomo1    | 0.52851182 | 0.00614265 | Mtm1y/-_UP |
| Pcyox1   | 0.52992181 | 0.03042937 | Mtm1y/-_UP |
| Ssr4     | 0.53127805 | 0.01765676 | Mtm1y/-_UP |
| F2       | 0.53135788 | 0.01540352 | Mtm1y/-_UP |
| Rcn1     | 0.53386427 | 0.03098856 | Mtm1y/-_UP |
| Prkaa2   | 0.53572985 | 0.04158156 | Mtm1y/-_UP |
| Yif1a    | 0.53599343 | 0.04323688 | Mtm1y/-_UP |
| Ogfod3   | 0.53628772 | 0.00754365 | Mtm1y/-_UP |

|          |            |            |            |
|----------|------------|------------|------------|
| Capn1    | 0.53662036 | 0.03406678 | Mtm1y/-_UP |
| Ncstn    | 0.53844582 | 0.00810111 | Mtm1y/-_UP |
| Micu2    | 0.53930601 | 0.01665419 | Mtm1y/-_UP |
| Ran      | 0.54434901 | 0.0440039  | Mtm1y/-_UP |
| Tmed5    | 0.54669876 | 0.02829425 | Mtm1y/-_UP |
| Glg1     | 0.54742336 | 0.00872229 | Mtm1y/-_UP |
| Fhl1     | 0.54751    | 0.00806212 | Mtm1y/-_UP |
| Hint1    | 0.54925909 | 0.00119245 | Mtm1y/-_UP |
| Anxa11   | 0.54990484 | 0.02759232 | Mtm1y/-_UP |
| Lman2l   | 0.55176533 | 0.01736447 | Mtm1y/-_UP |
| Glrx     | 0.55177229 | 0.03142177 | Mtm1y/-_UP |
| Atp6v1b2 | 0.55346465 | 0.01664447 | Mtm1y/-_UP |
| Camk2a   | 0.55613276 | 0.03109448 | Mtm1y/-_UP |
| Mrpl1    | 0.55718865 | 0.03327076 | Mtm1y/-_UP |
| Vim      | 0.55813047 | 0.03042937 | Mtm1y/-_UP |
| Pomgnt1  | 0.55920679 | 0.01327865 | Mtm1y/-_UP |
| Lypla2   | 0.56293836 | 0.0440039  | Mtm1y/-_UP |
| Ccpg1    | 0.56329747 | 0.02475125 | Mtm1y/-_UP |
| Hyou1    | 0.56697875 | 0.00246199 | Mtm1y/-_UP |
| Eif3d    | 0.56749012 | 0.03271331 | Mtm1y/-_UP |
| Ptpn3    | 0.56807034 | 0.02117357 | Mtm1y/-_UP |
| Eef1a1   | 0.56906882 | 0.0028082  | Mtm1y/-_UP |
| Erap1    | 0.57113517 | 0.03301036 | Mtm1y/-_UP |
| Atp6v1a  | 0.5711654  | 0.00094348 | Mtm1y/-_UP |
| Esyt2    | 0.57396831 | 0.00972013 | Mtm1y/-_UP |
| Macf1    | 0.57446538 | 0.0253275  | Mtm1y/-_UP |
| Sgpl1    | 0.57506235 | 0.04789589 | Mtm1y/-_UP |
| B3galnt2 | 0.5763221  | 0.02989426 | Mtm1y/-_UP |
| Ptprm    | 0.57827061 | 0.03179855 | Mtm1y/-_UP |
| Copb1    | 0.57828047 | 0.00845322 | Mtm1y/-_UP |
| Rasa4    | 0.57852043 | 0.03042937 | Mtm1y/-_UP |
| Gnai3    | 0.57983741 | 0.04993527 | Mtm1y/-_UP |

|          |            |            |            |
|----------|------------|------------|------------|
| Eif1     | 0.58240698 | 0.02463229 | Mtm1y/-_UP |
| Tuba1c   | 0.58406691 | 0.02580807 | Mtm1y/-_UP |
| Atp6v1e1 | 0.58536912 | 0.01960636 | Mtm1y/-_UP |
| Stt3a    | 0.58564255 | 0.00781883 | Mtm1y/-_UP |
| Map4     | 0.58586711 | 0.04911358 | Mtm1y/-_UP |
| Hsd17b12 | 0.58736554 | 0.00823556 | Mtm1y/-_UP |
| Cyb5d2   | 0.58762079 | 0.01792204 | Mtm1y/-_UP |
| Atp6v1g1 | 0.58944381 | 0.03161721 | Mtm1y/-_UP |
| Psma5    | 0.58966533 | 0.03098856 | Mtm1y/-_UP |
| Fkbp3    | 0.59020852 | 0.04756837 | Mtm1y/-_UP |
| Use1     | 0.59243325 | 0.03537759 | Mtm1y/-_UP |
| Glod4    | 0.59302915 | 0.01959089 | Mtm1y/-_UP |
| Pon3     | 0.59313676 | 0.01940062 | Mtm1y/-_UP |
| Selenof  | 0.59435647 | 0.02276583 | Mtm1y/-_UP |
| Mindy1   | 0.59670329 | 0.04372355 | Mtm1y/-_UP |
| Micu1    | 0.59729094 | 0.00266057 | Mtm1y/-_UP |
| Parva    | 0.59751744 | 0.01609468 | Mtm1y/-_UP |
| Dnajc10  | 0.59819345 | 0.00581109 | Mtm1y/-_UP |
| Rragc    | 0.59961041 | 0.02374279 | Mtm1y/-_UP |
| Sf3b1    | 0.60082109 | 0.01469282 | Mtm1y/-_UP |
| Hnrnph2  | 0.60305064 | 0.03352086 | Mtm1y/-_UP |
| Hnrnph1  | 0.60314057 | 0.03902682 | Mtm1y/-_UP |
| Atp6v0a1 | 0.60318059 | 0.00668997 | Mtm1y/-_UP |
| Tor1b    | 0.60401279 | 0.00523129 | Mtm1y/-_UP |
| Styxl2   | 0.60476085 | 0.017533   | Mtm1y/-_UP |
| Cmpk1    | 0.60920689 | 0.02910157 | Mtm1y/-_UP |
| Nop58    | 0.61030786 | 0.04993527 | Mtm1y/-_UP |
| Sdf2     | 0.61298405 | 0.00428611 | Mtm1y/-_UP |
| Nsdhl    | 0.61505913 | 0.02738138 | Mtm1y/-_UP |
| Fhod1    | 0.61568289 | 0.00980885 | Mtm1y/-_UP |
| Pusl1    | 0.61666353 | 0.02644254 | Mtm1y/-_UP |
| Utrn     | 0.62207327 | 0.0364311  | Mtm1y/-_UP |

|          |            |            |            |
|----------|------------|------------|------------|
| Bin1     | 0.62518047 | 0.01960636 | Mtm1y/-_UP |
| Cant1    | 0.62573169 | 0.04174763 | Mtm1y/-_UP |
| Naa50    | 0.62669306 | 0.01086509 | Mtm1y/-_UP |
| Tmed10   | 0.62759067 | 0.00987415 | Mtm1y/-_UP |
| Vars2    | 0.62905494 | 0.02065466 | Mtm1y/-_UP |
| Prxl2b   | 0.63008181 | 0.01665329 | Mtm1y/-_UP |
| U2af1    | 0.63278477 | 0.04031388 | Mtm1y/-_UP |
| Erp44    | 0.63553626 | 0.0145517  | Mtm1y/-_UP |
| Rab7a    | 0.63563353 | 0.00094348 | Mtm1y/-_UP |
| Nucb1    | 0.63915514 | 0.00227109 | Mtm1y/-_UP |
| Tmed1    | 0.63943914 | 0.00444848 | Mtm1y/-_UP |
| Ano6     | 0.63958046 | 0.03098856 | Mtm1y/-_UP |
| Vapa     | 0.64105722 | 0.00258289 | Mtm1y/-_UP |
| Tmx3     | 0.64293462 | 0.00188855 | Mtm1y/-_UP |
| Tnpo3    | 0.64393303 | 0.0440039  | Mtm1y/-_UP |
| Atp6v0d1 | 0.64618124 | 0.0008734  | Mtm1y/-_UP |
| Sf3b3    | 0.64630484 | 0.03161721 | Mtm1y/-_UP |
| Gtpbp3   | 0.64637809 | 0.04756837 | Mtm1y/-_UP |
| Selenoi  | 0.64673025 | 0.02733489 | Mtm1y/-_UP |
| Tmx4     | 0.64693174 | 0.03800795 | Mtm1y/-_UP |
| Psmb1    | 0.64696313 | 0.04798047 | Mtm1y/-_UP |
| B3galt6  | 0.65108902 | 0.01792204 | Mtm1y/-_UP |
| Bpnt2    | 0.65244734 | 0.01031547 | Mtm1y/-_UP |
| Cpd      | 0.65364799 | 0.00302254 | Mtm1y/-_UP |
| Lpgat1   | 0.65477993 | 0.03406678 | Mtm1y/-_UP |
| Asph     | 0.65875699 | 0.02488242 | Mtm1y/-_UP |
| Mrps24   | 0.65966344 | 0.02801474 | Mtm1y/-_UP |
| Esyt1    | 0.66012034 | 0.00267847 | Mtm1y/-_UP |
| Mrpl22   | 0.66058263 | 0.01521589 | Mtm1y/-_UP |
| Camk2b   | 0.66160708 | 0.02382735 | Mtm1y/-_UP |
| Mrpl52   | 0.66277362 | 0.0440039  | Mtm1y/-_UP |
| Pdia4    | 0.66356015 | 0.0090194  | Mtm1y/-_UP |

|           |            |            |            |
|-----------|------------|------------|------------|
| Rnh1      | 0.66593885 | 0.00342091 | Mtm1y/-_UP |
| Pet117    | 0.66690209 | 0.04384376 | Mtm1y/-_UP |
| Sod1      | 0.66787064 | 0.03999167 | Mtm1y/-_UP |
| Tom1      | 0.66855046 | 0.02100579 | Mtm1y/-_UP |
| Rusf1     | 0.66869169 | 0.00251422 | Mtm1y/-_UP |
| Myl1      | 0.67049982 | 0.04201775 | Mtm1y/-_UP |
| Klhl31    | 0.67176521 | 0.04142805 | Mtm1y/-_UP |
| Mcu       | 0.67191005 | 0.01609468 | Mtm1y/-_UP |
| Dnajb11   | 0.67490938 | 0.00103778 | Mtm1y/-_UP |
| Fgfrl1    | 0.67588664 | 0.0212068  | Mtm1y/-_UP |
| Prpf6     | 0.67605676 | 0.01376163 | Mtm1y/-_UP |
| Atp6v1h   | 0.67671299 | 0.01086509 | Mtm1y/-_UP |
| Eif5a     | 0.67736739 | 0.00120056 | Mtm1y/-_UP |
| Mrps33    | 0.67856055 | 0.03653964 | Mtm1y/-_UP |
| Erlec1    | 0.68107305 | 0.00342353 | Mtm1y/-_UP |
| Vapb      | 0.68227439 | 0.00447382 | Mtm1y/-_UP |
| Hnrnpm    | 0.68273139 | 0.00267847 | Mtm1y/-_UP |
| P4hb      | 0.68342139 | 0.02580807 | Mtm1y/-_UP |
| Hnrnpa2b1 | 0.68475448 | 0.00729495 | Mtm1y/-_UP |
| Hsp90b1   | 0.68576026 | 0.00235121 | Mtm1y/-_UP |
| Txndc5    | 0.69050066 | 0.01301628 | Mtm1y/-_UP |
| Atp1b3    | 0.69196513 | 0.02835636 | Mtm1y/-_UP |
| Mogs      | 0.69481449 | 0.00239301 | Mtm1y/-_UP |
| Ergic2    | 0.69497722 | 0.00659322 | Mtm1y/-_UP |
| Eef1g     | 0.69517096 | 0.00810111 | Mtm1y/-_UP |
| Tnxb      | 0.69624206 | 0.03394029 | Mtm1y/-_UP |
| Cdh13     | 0.69742328 | 0.04055681 | Mtm1y/-_UP |
| Stx12     | 0.69872584 | 0.04530995 | Mtm1y/-_UP |
| Clptm1l   | 0.69943116 | 0.02228774 | Mtm1y/-_UP |
| Mff       | 0.703399   | 0.03161721 | Mtm1y/-_UP |
| Atp6v1c1  | 0.70395465 | 0.02435883 | Mtm1y/-_UP |
| Ergic3    | 0.70513401 | 0.00538639 | Mtm1y/-_UP |

|          |            |            |            |
|----------|------------|------------|------------|
| Elac2    | 0.70632685 | 0.03355193 | Mtm1y/-_UP |
| Nt5dc3   | 0.70941407 | 0.00850627 | Mtm1y/-_UP |
| Rcn2     | 0.71076213 | 0.02243489 | Mtm1y/-_UP |
| Spcs1    | 0.7127419  | 0.01107467 | Mtm1y/-_UP |
| Sdf2l1   | 0.71910326 | 0.01143754 | Mtm1y/-_UP |
| Hdgf     | 0.72019706 | 0.03252722 | Mtm1y/-_UP |
| Alg2     | 0.72030418 | 0.01348706 | Mtm1y/-_UP |
| Dnase1l1 | 0.7211727  | 0.04145448 | Mtm1y/-_UP |
| Kars1    | 0.72248454 | 0.00208361 | Mtm1y/-_UP |
| Pgd      | 0.72281056 | 0.00385513 | Mtm1y/-_UP |
| Enpp4    | 0.72777902 | 0.00734774 | Mtm1y/-_UP |
| Sec11a   | 0.73142611 | 0.01313359 | Mtm1y/-_UP |
| Vti1b    | 0.73288431 | 0.02030661 | Mtm1y/-_UP |
| Ahsa1    | 0.73343174 | 0.04724515 | Mtm1y/-_UP |
| Apoa4    | 0.73432259 | 0.01051887 | Mtm1y/-_UP |
| Tor3a    | 0.73494685 | 0.00602002 | Mtm1y/-_UP |
| Tubb3    | 0.73511891 | 0.03609991 | Mtm1y/-_UP |
| Hnrnph3  | 0.7351734  | 0.0441642  | Mtm1y/-_UP |
| Extl3    | 0.73520171 | 0.01537563 | Mtm1y/-_UP |
| Scarb2   | 0.73547879 | 0.00258289 | Mtm1y/-_UP |
| Mtrf1    | 0.73599474 | 0.02774077 | Mtm1y/-_UP |
| Ssr3     | 0.73600331 | 0.04031388 | Mtm1y/-_UP |
| Bola2    | 0.73856532 | 0.03394408 | Mtm1y/-_UP |
| Psm2     | 0.74015938 | 0.04228496 | Mtm1y/-_UP |
| Asph     | 0.74058498 | 0.01665419 | Mtm1y/-_UP |
| Tmco1    | 0.74189013 | 0.01857438 | Mtm1y/-_UP |
| Abhd17b  | 0.74428556 | 0.03212957 | Mtm1y/-_UP |
| Trnt1    | 0.74547858 | 0.03252722 | Mtm1y/-_UP |
| Plg      | 0.74777287 | 0.01241385 | Mtm1y/-_UP |
| Tm9sf3   | 0.7479986  | 0.00532202 | Mtm1y/-_UP |
| Srl      | 0.74802777 | 0.0050427  | Mtm1y/-_UP |
| Tm9sf4   | 0.74958098 | 0.00981371 | Mtm1y/-_UP |

|          |            |            |            |
|----------|------------|------------|------------|
| Cemip2   | 0.75485832 | 0.00245829 | Mtm1y/-_UP |
| Faf2     | 0.75813172 | 0.03537759 | Mtm1y/-_UP |
| Pasma3   | 0.75987925 | 0.01435037 | Mtm1y/-_UP |
| Pdia6    | 0.76024303 | 0.01249947 | Mtm1y/-_UP |
| Itga5    | 0.76065789 | 0.02989426 | Mtm1y/-_UP |
| Tor1aip2 | 0.76252961 | 0.00477698 | Mtm1y/-_UP |
| Ptges3   | 0.76262152 | 0.00385513 | Mtm1y/-_UP |
| Pisd     | 0.76590326 | 0.00885501 | Mtm1y/-_UP |
| Psemb2   | 0.76620677 | 0.00973614 | Mtm1y/-_UP |
| Cope     | 0.76788968 | 0.02902819 | Mtm1y/-_UP |
| Tm9sf2   | 0.77144084 | 0.00173833 | Mtm1y/-_UP |
| Hm13     | 0.77167855 | 0.01246934 | Mtm1y/-_UP |
| Serinc1  | 0.77173454 | 0.02149831 | Mtm1y/-_UP |
| Pdia3    | 0.77231971 | 0.02123233 | Mtm1y/-_UP |
| Syvn1    | 0.77379363 | 0.03579174 | Mtm1y/-_UP |
| Card19   | 0.77617354 | 0.0023638  | Mtm1y/-_UP |
| Mtpn     | 0.77647575 | 0.01585332 | Mtm1y/-_UP |
| Thoc2    | 0.77732263 | 0.01893659 | Mtm1y/-_UP |
| Aplp2    | 0.78010939 | 0.03269609 | Mtm1y/-_UP |
| Arf6     | 0.78032765 | 0.00323623 | Mtm1y/-_UP |
| Rbm24    | 0.78262987 | 0.01668091 | Mtm1y/-_UP |
| Yme1l1   | 0.78463437 | 0.03139357 | Mtm1y/-_UP |
| Psemb7   | 0.78620253 | 0.01212165 | Mtm1y/-_UP |
| Npm1     | 0.78670326 | 0.02975669 | Mtm1y/-_UP |
| Shisa4   | 0.78819359 | 0.02984739 | Mtm1y/-_UP |
| Ubqln1   | 0.79172815 | 0.01301243 | Mtm1y/-_UP |
| Mif      | 0.79180647 | 0.02801474 | Mtm1y/-_UP |
| Bzw1     | 0.79547941 | 0.02738138 | Mtm1y/-_UP |
| Prkab2   | 0.79666272 | 0.01499929 | Mtm1y/-_UP |
| Abcg2    | 0.79923589 | 0.04911358 | Mtm1y/-_UP |
| Sec22b   | 0.79925643 | 0.00612026 | Mtm1y/-_UP |
| Sppl2b   | 0.80033419 | 0.02835636 | Mtm1y/-_UP |

|               |            |            |            |
|---------------|------------|------------|------------|
| Eef1d         | 0.8009785  | 0.0190986  | Mtm1y/-_UP |
| Hnrnpa3       | 0.80110221 | 0.02153545 | Mtm1y/-_UP |
| Ube2i         | 0.80336795 | 0.022668   | Mtm1y/-_UP |
| Gpr107        | 0.80683801 | 0.00150238 | Mtm1y/-_UP |
| Asah1         | 0.80806858 | 0.00659322 | Mtm1y/-_UP |
| Htra2         | 0.81151343 | 0.04789589 | Mtm1y/-_UP |
| Gba1          | 0.81246056 | 0.00581109 | Mtm1y/-_UP |
| Fkbp9         | 0.81543449 | 0.03139357 | Mtm1y/-_UP |
| Igf2r         | 0.8155554  | 0.00188855 | Mtm1y/-_UP |
| Smarca4       | 0.81586886 | 0.02873787 | Mtm1y/-_UP |
| Gstm2         | 0.81702897 | 0.01051887 | Mtm1y/-_UP |
| Tmem41b       | 0.81820234 | 0.02807068 | Mtm1y/-_UP |
| Nln           | 0.820311   | 0.02975669 | Mtm1y/-_UP |
| Vkorc1        | 0.82089162 | 0.04756837 | Mtm1y/-_UP |
| 4931406C07Rik | 0.82119599 | 0.00520904 | Mtm1y/-_UP |
| Mob4          | 0.82196743 | 0.00581109 | Mtm1y/-_UP |
| Atp6v0c       | 0.8220592  | 0.00266057 | Mtm1y/-_UP |
| Slc44a1       | 0.82244911 | 0.04655638 | Mtm1y/-_UP |
| Mia3          | 0.82496545 | 0.00411909 | Mtm1y/-_UP |
| Epdr1         | 0.82602255 | 0.00698448 | Mtm1y/-_UP |
| Dnajc3        | 0.8289376  | 0.00703313 | Mtm1y/-_UP |
| Wipi1         | 0.8296652  | 0.02989426 | Mtm1y/-_UP |
| Fam136a       | 0.83320426 | 0.04176531 | Mtm1y/-_UP |
| Fkbp5         | 0.83341109 | 0.02230589 | Mtm1y/-_UP |
| Alg5          | 0.83470653 | 0.02873787 | Mtm1y/-_UP |
| Pofut1        | 0.83526995 | 0.00342091 | Mtm1y/-_UP |
| Itgb1bp2      | 0.8360762  | 0.01857438 | Mtm1y/-_UP |
| Ctsl          | 0.83750033 | 0.02435208 | Mtm1y/-_UP |
| Kpna3         | 0.83869189 | 0.02153545 | Mtm1y/-_UP |
| Ca3           | 0.83966688 | 0.0264425  | Mtm1y/-_UP |
| Shmt2         | 0.83989817 | 0.02169053 | Mtm1y/-_UP |
| Sel1l         | 0.84316669 | 0.00135676 | Mtm1y/-_UP |

|         |            |            |            |
|---------|------------|------------|------------|
| Ier3ip1 | 0.84401528 | 0.01178593 | Mtm1y/-_UP |
| Myl10   | 0.84486462 | 0.04789589 | Mtm1y/-_UP |
| Acbd3   | 0.84541047 | 0.00833843 | Mtm1y/-_UP |
| Eno1    | 0.8468152  | 0.03788541 | Mtm1y/-_UP |
| G6pc3   | 0.84752977 | 0.01857438 | Mtm1y/-_UP |
| Ppia    | 0.84907793 | 0.00473562 | Mtm1y/-_UP |
| Hnrnpa0 | 0.85163315 | 0.02677832 | Mtm1y/-_UP |
| Mapre3  | 0.85234638 | 0.01665419 | Mtm1y/-_UP |
| Api5    | 0.85302623 | 0.01736447 | Mtm1y/-_UP |
| Dhrsx   | 0.85339016 | 0.02242091 | Mtm1y/-_UP |
| Golt1b  | 0.85509714 | 0.0462145  | Mtm1y/-_UP |
| Rer1    | 0.85524277 | 0.00789712 | Mtm1y/-_UP |
| Sec61g  | 0.85548876 | 0.03161721 | Mtm1y/-_UP |
| Ctsd    | 0.85688259 | 0.01940062 | Mtm1y/-_UP |
| Tmem167 | 0.85837244 | 0.00296904 | Mtm1y/-_UP |
| Carhsp1 | 0.86219078 | 0.01905863 | Mtm1y/-_UP |
| Ubxn4   | 0.86494136 | 0.0440039  | Mtm1y/-_UP |
| Sacs    | 0.86600994 | 0.03179855 | Mtm1y/-_UP |
| Dpm1    | 0.86846463 | 0.02198061 | Mtm1y/-_UP |
| Ubxn1   | 0.87018929 | 0.03650526 | Mtm1y/-_UP |
| Igf1r   | 0.87170191 | 0.04934472 | Mtm1y/-_UP |
| Galnt2  | 0.87313348 | 0.00083054 | Mtm1y/-_UP |
| Galnt7  | 0.87330462 | 0.02929605 | Mtm1y/-_UP |
| Cst3    | 0.87460321 | 0.00385513 | Mtm1y/-_UP |
| Arf5    | 0.87522462 | 0.03314839 | Mtm1y/-_UP |
| Neo1    | 0.87620808 | 0.02119231 | Mtm1y/-_UP |
| Gsr     | 0.87625976 | 0.01146351 | Mtm1y/-_UP |
| Cox11   | 0.87951508 | 0.0253275  | Mtm1y/-_UP |
| Ckap5   | 0.88179923 | 0.00565348 | Mtm1y/-_UP |
| Anxa4   | 0.88370959 | 0.00117581 | Mtm1y/-_UP |
| Psmb4   | 0.88459897 | 0.01544726 | Mtm1y/-_UP |
| Gusb    | 0.88695792 | 0.01592506 | Mtm1y/-_UP |

|          |            |            |            |
|----------|------------|------------|------------|
| Rnf13    | 0.89085702 | 0.01515378 | Mtm1y/-_UP |
| Smdt1    | 0.89365793 | 0.01485337 | Mtm1y/-_UP |
| Pgrmc2   | 0.89762924 | 0.01094457 | Mtm1y/-_UP |
| Gpr89    | 0.89856527 | 0.01693163 | Mtm1y/-_UP |
| Jsrp1    | 0.89865404 | 0.00266057 | Mtm1y/-_UP |
| Tpt1     | 0.8988603  | 0.00083054 | Mtm1y/-_UP |
| Ampd3    | 0.89989192 | 0.00612026 | Mtm1y/-_UP |
| Txn      | 0.90178891 | 0.00083054 | Mtm1y/-_UP |
| Pafah1b1 | 0.90307654 | 0.01753874 | Mtm1y/-_UP |
| Dynlt1a  | 0.90441944 | 0.04870637 | Mtm1y/-_UP |
| Gpx1     | 0.90520464 | 0.00239301 | Mtm1y/-_UP |
| Psmb3    | 0.90701342 | 0.03305516 | Mtm1y/-_UP |
| Tmem131  | 0.90715506 | 0.00456354 | Mtm1y/-_UP |
| Adpgk    | 0.90789874 | 0.00140564 | Mtm1y/-_UP |
| Ctsa     | 0.90854719 | 0.00083054 | Mtm1y/-_UP |
| Ccn2     | 0.90900781 | 0.03989619 | Mtm1y/-_UP |
| Bola1    | 0.90944173 | 0.03139357 | Mtm1y/-_UP |
| Rbp1     | 0.91061619 | 0.04787641 | Mtm1y/-_UP |
| Dipk1a   | 0.91394844 | 0.01693163 | Mtm1y/-_UP |
| Polr2h   | 0.91451254 | 0.04158156 | Mtm1y/-_UP |
| Naxe     | 0.91858431 | 0.01974151 | Mtm1y/-_UP |
| Rab6a    | 0.91867963 | 0.04911358 | Mtm1y/-_UP |
| Snd1     | 0.92221437 | 0.00662002 | Mtm1y/-_UP |
| Ncs1     | 0.92402814 | 0.01572423 | Mtm1y/-_UP |
| Psmb5    | 0.92515356 | 0.01418117 | Mtm1y/-_UP |
| Slc9a1   | 0.92704879 | 0.02119231 | Mtm1y/-_UP |
| Plp2     | 0.93229588 | 0.01178593 | Mtm1y/-_UP |
| Abat     | 0.93981805 | 0.0097603  | Mtm1y/-_UP |
| Purb     | 0.94009674 | 0.01148219 | Mtm1y/-_UP |
| Gorasp2  | 0.94274389 | 0.04911358 | Mtm1y/-_UP |
| Txndc17  | 0.94387201 | 0.00472417 | Mtm1y/-_UP |
| Cspg4    | 0.94923034 | 0.00408585 | Mtm1y/-_UP |

|            |            |            |            |
|------------|------------|------------|------------|
| Erp29      | 0.95835472 | 0.00235121 | Mtm1y/-_UP |
| Dynll1     | 0.96065595 | 0.01665419 | Mtm1y/-_UP |
| Erlin2     | 0.96071774 | 0.00140564 | Mtm1y/-_UP |
| Plbd2      | 0.96111467 | 0.0212068  | Mtm1y/-_UP |
| Coq8b      | 0.96265845 | 0.03400269 | Mtm1y/-_UP |
| Lum        | 0.96306721 | 0.00827604 | Mtm1y/-_UP |
| Sh3bgrl    | 0.96433199 | 0.00754825 | Mtm1y/-_UP |
| Twsg1      | 0.96554345 | 0.02455894 | Mtm1y/-_UP |
| Dusp3      | 0.97172634 | 0.00154872 | Mtm1y/-_UP |
| Spcs2      | 0.97988212 | 0.01643177 | Mtm1y/-_UP |
| Clic4      | 0.98282735 | 0.01187909 | Mtm1y/-_UP |
| Serbp1     | 0.98370836 | 0.03419502 | Mtm1y/-_UP |
| Polr2l     | 0.98605856 | 0.03183311 | Mtm1y/-_UP |
| Edem3      | 0.98897113 | 0.00342091 | Mtm1y/-_UP |
| Diablo     | 0.99077916 | 0.00084105 | Mtm1y/-_UP |
| Csgalnact2 | 0.9910768  | 0.01139699 | Mtm1y/-_UP |
| Tapbp      | 0.99151237 | 0.04356963 | Mtm1y/-_UP |
| Ppic       | 0.992271   | 0.02902819 | Mtm1y/-_UP |
| Cap2       | 0.99739268 | 0.00703313 | Mtm1y/-_UP |
| Serping1   | 1.00185095 | 0.00698448 | Mtm1y/-_UP |
| Lmna       | 1.00611546 | 0.00827818 | Mtm1y/-_UP |
| Atox1      | 1.00825151 | 0.02519805 | Mtm1y/-_UP |
| Mycbp2     | 1.0089017  | 0.00428611 | Mtm1y/-_UP |
| Rras       | 1.00914594 | 0.00958586 | Mtm1y/-_UP |
| Tmed7      | 1.00986303 | 0.02175898 | Mtm1y/-_UP |
| Acp2       | 1.01250097 | 0.01892298 | Mtm1y/-_UP |
| Aspn       | 1.01287333 | 0.01014297 | Mtm1y/-_UP |
| Naga       | 1.01809214 | 0.00188855 | Mtm1y/-_UP |
| Pon2       | 1.02132784 | 0.0028082  | Mtm1y/-_UP |
| Prrc1      | 1.0243964  | 0.02975669 | Mtm1y/-_UP |
| Pycr2      | 1.02651352 | 0.002692   | Mtm1y/-_UP |
| Hyi        | 1.0268202  | 0.03117119 | Mtm1y/-_UP |

|         |            |            |            |
|---------|------------|------------|------------|
| Poglut3 | 1.02757369 | 0.00659322 | Mtm1y/-_UP |
| Tmed3   | 1.03073448 | 0.00679399 | Mtm1y/-_UP |
| Add3    | 1.03162413 | 0.01643177 | Mtm1y/-_UP |
| Lgmn    | 1.03239706 | 0.0050427  | Mtm1y/-_UP |
| H13     | 1.03487176 | 0.03042937 | Mtm1y/-_UP |
| Lman2   | 1.03861162 | 0.00015212 | Mtm1y/-_UP |
| Ergic1  | 1.0407917  | 0.00135676 | Mtm1y/-_UP |
| Tgoln1  | 1.04736292 | 0.00668997 | Mtm1y/-_UP |
| Hsd11b1 | 1.0496099  | 0.03098347 | Mtm1y/-_UP |
| Chid1   | 1.05130952 | 0.00810111 | Mtm1y/-_UP |
| Aldh1b1 | 1.05301327 | 0.02919739 | Mtm1y/-_UP |
| Galns   | 1.05868362 | 0.04789589 | Mtm1y/-_UP |
| Vma21   | 1.05993286 | 0.02140964 | Mtm1y/-_UP |
| Dhrs7   | 1.06143875 | 0.00530312 | Mtm1y/-_UP |
| Dpp3    | 1.06213606 | 0.00778071 | Mtm1y/-_UP |
| Slc38a2 | 1.0641172  | 0.0392291  | Mtm1y/-_UP |
| Lmo7    | 1.07034043 | 0.00473562 | Mtm1y/-_UP |
| Tmem87a | 1.07541861 | 0.00744271 | Mtm1y/-_UP |
| Cox17   | 1.07828195 | 0.04036612 | Mtm1y/-_UP |
| Antkmt  | 1.07868093 | 0.00110855 | Mtm1y/-_UP |
| Eef1b   | 1.08014321 | 0.02366211 | Mtm1y/-_UP |
| Golim4  | 1.08252855 | 0.02065652 | Mtm1y/-_UP |
| Abhd4   | 1.08324364 | 0.04626722 | Mtm1y/-_UP |
| Dbi     | 1.08333845 | 0.01107467 | Mtm1y/-_UP |
| Anxa8   | 1.08463121 | 0.02950399 | Mtm1y/-_UP |
| Lipt2   | 1.09049519 | 0.00964696 | Mtm1y/-_UP |
| Adipoq  | 1.09175072 | 0.03224034 | Mtm1y/-_UP |
| Wnt9a   | 1.09235406 | 0.01261577 | Mtm1y/-_UP |
| Grb10   | 1.09464194 | 0.02917897 | Mtm1y/-_UP |
| Mybpc1  | 1.10194195 | 0.03098856 | Mtm1y/-_UP |
| Hebp1   | 1.10314711 | 0.00754197 | Mtm1y/-_UP |
| Pfn1    | 1.10367724 | 0.00405103 | Mtm1y/-_UP |

|          |            |            |            |
|----------|------------|------------|------------|
| B4galt1  | 1.10480567 | 0.00322728 | Mtm1y/-_UP |
| Tgfb2    | 1.10594306 | 0.01327865 | Mtm1y/-_UP |
| Rdh11    | 1.10710614 | 0.00211127 | Mtm1y/-_UP |
| Npc2     | 1.10801896 | 0.01824044 | Mtm1y/-_UP |
| Pla2g6   | 1.1095517  | 0.03098856 | Mtm1y/-_UP |
| Calu     | 1.11055233 | 0.00823556 | Mtm1y/-_UP |
| Blmh     | 1.11323445 | 0.04743239 | Mtm1y/-_UP |
| Itm2b    | 1.12112191 | 0.01645187 | Mtm1y/-_UP |
| Akt2     | 1.12122123 | 0.00048105 | Mtm1y/-_UP |
| Anxa7    | 1.12567099 | 0.00205117 | Mtm1y/-_UP |
| Traf2    | 1.12607758 | 0.03924923 | Mtm1y/-_UP |
| Txndc12  | 1.1363623  | 0.01792204 | Mtm1y/-_UP |
| Slc2a1   | 1.13729777 | 0.03534499 | Mtm1y/-_UP |
| Lcp1     | 1.145672   | 0.04031388 | Mtm1y/-_UP |
| Sbspon   | 1.14608593 | 0.04226615 | Mtm1y/-_UP |
| Cfd      | 1.14871373 | 0.01792204 | Mtm1y/-_UP |
| Lyplal1  | 1.14899872 | 0.00258289 | Mtm1y/-_UP |
| Cobl     | 1.14933317 | 0.0440039  | Mtm1y/-_UP |
| Kiaa2013 | 1.15085662 | 0.00698448 | Mtm1y/-_UP |
| Uxs1     | 1.15109327 | 0.00122395 | Mtm1y/-_UP |
| Flrt2    | 1.15112957 | 0.00581109 | Mtm1y/-_UP |
| Galnt1   | 1.15137886 | 0.00258289 | Mtm1y/-_UP |
| Pex5     | 1.15353467 | 0.03014907 | Mtm1y/-_UP |
| Slc35a3  | 1.1536126  | 0.03269609 | Mtm1y/-_UP |
| Fkbp7    | 1.1555644  | 0.00842041 | Mtm1y/-_UP |
| Pcyox1l  | 1.15700709 | 0.00398026 | Mtm1y/-_UP |
| Plod2    | 1.1603678  | 0.02325362 | Mtm1y/-_UP |
| Ecm1     | 1.16132314 | 0.00039887 | Mtm1y/-_UP |
| Anpep    | 1.16207331 | 0.03139357 | Mtm1y/-_UP |
| Dysf     | 1.16432372 | 0.04384376 | Mtm1y/-_UP |
| Pasma4   | 1.16492037 | 0.00171977 | Mtm1y/-_UP |
| Crtap    | 1.16916005 | 0.03410725 | Mtm1y/-_UP |

|          |            |            |            |
|----------|------------|------------|------------|
| Add1     | 1.17031292 | 0.00729495 | Mtm1y/-_UP |
| Ehbp111  | 1.17107844 | 0.00754365 | Mtm1y/-_UP |
| Zbed5    | 1.1737201  | 0.00529698 | Mtm1y/-_UP |
| Syne1    | 1.17560564 | 0.04338801 | Mtm1y/-_UP |
| Gaa      | 1.17711372 | 0.00076649 | Mtm1y/-_UP |
| Me2      | 1.17895997 | 0.00083054 | Mtm1y/-_UP |
| Pin1     | 1.17947887 | 0.01995004 | Mtm1y/-_UP |
| Rint1    | 1.1798656  | 0.0075836  | Mtm1y/-_UP |
| Fbxo30   | 1.18414397 | 0.01451047 | Mtm1y/-_UP |
| Adgre5   | 1.18521593 | 0.00188855 | Mtm1y/-_UP |
| Fkbp10   | 1.18625841 | 0.02677832 | Mtm1y/-_UP |
| Obsl1    | 1.18736499 | 0.01932822 | Mtm1y/-_UP |
| Mlec     | 1.18778297 | 0.00165166 | Mtm1y/-_UP |
| Xirp1    | 1.18877158 | 0.00760896 | Mtm1y/-_UP |
| Tmem62   | 1.1904043  | 0.03426089 | Mtm1y/-_UP |
| Neb      | 1.19281353 | 0.04659345 | Mtm1y/-_UP |
| S100a16  | 1.19302741 | 0.03629378 | Mtm1y/-_UP |
| Set      | 1.19604322 | 0.00267847 | Mtm1y/-_UP |
| Cd99l2   | 1.19872196 | 0.00135676 | Mtm1y/-_UP |
| Ablim1   | 1.20134954 | 0.00930746 | Mtm1y/-_UP |
| Vps52    | 1.20553066 | 0.02921538 | Mtm1y/-_UP |
| Arf4     | 1.20587713 | 0.01013171 | Mtm1y/-_UP |
| Yipf6    | 1.21024784 | 0.00083054 | Mtm1y/-_UP |
| Timp2    | 1.21195232 | 0.0190986  | Mtm1y/-_UP |
| Dipk2a   | 1.21257129 | 0.0253275  | Mtm1y/-_UP |
| Aldh18a1 | 1.21493103 | 0.00490834 | Mtm1y/-_UP |
| Vwa5a    | 1.2167186  | 0.0002311  | Mtm1y/-_UP |
| Cdnf     | 1.21858054 | 0.00188855 | Mtm1y/-_UP |
| Krt18    | 1.2231825  | 0.03098856 | Mtm1y/-_UP |
| Lrrn1    | 1.22395163 | 0.00438691 | Mtm1y/-_UP |
| Cd63     | 1.22526932 | 0.01665419 | Mtm1y/-_UP |
| Plxdc2   | 1.2257676  | 0.0022845  | Mtm1y/-_UP |

|         |            |            |            |
|---------|------------|------------|------------|
| Hspb8   | 1.23200056 | 0.01285797 | Mtm1y/-_UP |
| Prune2  | 1.2321768  | 0.00609129 | Mtm1y/-_UP |
| Fut8    | 1.23523915 | 0.0440039  | Mtm1y/-_UP |
| Hars1   | 1.23783922 | 0.01149198 | Mtm1y/-_UP |
| Mtdh    | 1.23805162 | 0.00122395 | Mtm1y/-_UP |
| Galnt17 | 1.24023873 | 0.00267847 | Mtm1y/-_UP |
| Hal     | 1.24823014 | 0.03640975 | Mtm1y/-_UP |
| Hmgn2   | 1.25214068 | 0.03042937 | Mtm1y/-_UP |
| Pgam5   | 1.2588658  | 0.00160883 | Mtm1y/-_UP |
| Eif1a   | 1.25968397 | 0.00071812 | Mtm1y/-_UP |
| H2-Aa   | 1.2602833  | 0.01989094 | Mtm1y/-_UP |
| Cybc1   | 1.27569765 | 0.00103778 | Mtm1y/-_UP |
| Poglut1 | 1.27622078 | 0.00563316 | Mtm1y/-_UP |
| Col5a2  | 1.29098877 | 0.03271331 | Mtm1y/-_UP |
| Sqstm1  | 1.29412863 | 0.01952776 | Mtm1y/-_UP |
| Cox19   | 1.30181482 | 0.01673349 | Mtm1y/-_UP |
| Ap2s1   | 1.30626511 | 0.00648976 | Mtm1y/-_UP |
| Osbpl8  | 1.30635079 | 0.00698448 | Mtm1y/-_UP |
| Sptbn2  | 1.30666866 | 0.04890803 | Mtm1y/-_UP |
| Efemp1  | 1.30729232 | 0.00375243 | Mtm1y/-_UP |
| Vps33b  | 1.31241391 | 0.00761253 | Mtm1y/-_UP |
| Tsg101  | 1.31308164 | 0.04205619 | Mtm1y/-_UP |
| Dpm3    | 1.31432447 | 0.00648976 | Mtm1y/-_UP |
| Cnpy3   | 1.31614118 | 0.00566046 | Mtm1y/-_UP |
| Tmem43  | 1.31654314 | 0.00120056 | Mtm1y/-_UP |
| Fth1    | 1.3182892  | 0.00664888 | Mtm1y/-_UP |
| Ces2c   | 1.32639087 | 0.01736447 | Mtm1y/-_UP |
| Ppib    | 1.32775294 | 0.00083054 | Mtm1y/-_UP |
| Acot9   | 1.33049311 | 0.00105906 | Mtm1y/-_UP |
| Gtpbp6  | 1.33641095 | 0.04100265 | Mtm1y/-_UP |
| Jag2    | 1.33765318 | 0.03365348 | Mtm1y/-_UP |
| Egf     | 1.33924588 | 0.0106449  | Mtm1y/-_UP |

|          |            |            |            |
|----------|------------|------------|------------|
| Pycr1    | 1.34094715 | 0.00083054 | Mtm1y/-_UP |
| Eif6     | 1.34167847 | 0.00795739 | Mtm1y/-_UP |
| Lgals3   | 1.35578865 | 0.00817409 | Mtm1y/-_UP |
| Pvr      | 1.36136979 | 0.02230589 | Mtm1y/-_UP |
| Mesd     | 1.36443552 | 0.00083054 | Mtm1y/-_UP |
| Nme1     | 1.3767449  | 0.00247209 | Mtm1y/-_UP |
| Hrg      | 1.38198979 | 0.00239301 | Mtm1y/-_UP |
| Sec11c   | 1.3827047  | 0.01572423 | Mtm1y/-_UP |
| Fbln1    | 1.38270738 | 0.01178593 | Mtm1y/-_UP |
| Cul7     | 1.38879285 | 0.03732606 | Mtm1y/-_UP |
| Xirp2    | 1.38979421 | 0.01301628 | Mtm1y/-_UP |
| Cd44     | 1.39146066 | 0.01266985 | Mtm1y/-_UP |
| Cyb561d2 | 1.39855545 | 0.00245829 | Mtm1y/-_UP |
| Cd55     | 1.4016787  | 0.00084136 | Mtm1y/-_UP |
| Stom     | 1.4082876  | 0.00691404 | Mtm1y/-_UP |
| Hprt1    | 1.41003127 | 0.00110855 | Mtm1y/-_UP |
| Vat1     | 1.41266918 | 0.017533   | Mtm1y/-_UP |
| Mtrex    | 1.42417983 | 0.02984739 | Mtm1y/-_UP |
| Ptprc    | 1.42799933 | 0.04158156 | Mtm1y/-_UP |
| Lrpap1   | 1.43015321 | 0.00077147 | Mtm1y/-_UP |
| None     | 1.43119362 | 0.03488738 | Mtm1y/-_UP |
| Rpl3     | 1.44083165 | 0.02110493 | Mtm1y/-_UP |
| Cpe      | 1.44209185 | 0.00532202 | Mtm1y/-_UP |
| Cnpy2    | 1.44627192 | 0.00235121 | Mtm1y/-_UP |
| C3       | 1.45622102 | 0.0017535  | Mtm1y/-_UP |
| Ddah2    | 1.45813698 | 0.01693163 | Mtm1y/-_UP |
| Acvr2a   | 1.45867481 | 0.03977552 | Mtm1y/-_UP |
| Serpib6a | 1.46175738 | 5.76E-05   | Mtm1y/-_UP |
| Pam      | 1.47163649 | 0.00105906 | Mtm1y/-_UP |
| Rnaset2b | 1.4730938  | 0.0019794  | Mtm1y/-_UP |
| Tgm1     | 1.47763116 | 0.04540771 | Mtm1y/-_UP |
| Mcl1     | 1.48411005 | 0.00105906 | Mtm1y/-_UP |

|           |            |            |            |
|-----------|------------|------------|------------|
| Snrpc     | 1.48505706 | 0.04787641 | Mtm1y/-_UP |
| Krt80     | 1.48939017 | 0.03421316 | Mtm1y/-_UP |
| Pyroxd2   | 1.49161999 | 9.98E-05   | Mtm1y/-_UP |
| Eda2r     | 1.49320241 | 0.02910157 | Mtm1y/-_UP |
| Ltbp3     | 1.50173104 | 0.00131135 | Mtm1y/-_UP |
| Cyb5r3    | 1.50185772 | 0.00020823 | Mtm1y/-_UP |
| Prkag3    | 1.50275599 | 0.00011985 | Mtm1y/-_UP |
| Otulin    | 1.50286274 | 0.01785726 | Mtm1y/-_UP |
| Gsn       | 1.50563058 | 0.00258289 | Mtm1y/-_UP |
| Fbln5     | 1.51019821 | 0.00208361 | Mtm1y/-_UP |
| Fn1       | 1.51080276 | 0.00188855 | Mtm1y/-_UP |
| Plxnb2    | 1.51820468 | 0.00189316 | Mtm1y/-_UP |
| Rrbp1     | 1.52824198 | 0.03653964 | Mtm1y/-_UP |
| Fbln2     | 1.5400235  | 0.00523516 | Mtm1y/-_UP |
| Fst       | 1.55123278 | 0.01665419 | Mtm1y/-_UP |
| Krt2      | 1.55625928 | 0.03098856 | Mtm1y/-_UP |
| Camk2d    | 1.55653514 | 0.00015212 | Mtm1y/-_UP |
| Calu      | 1.55758409 | 0.00103272 | Mtm1y/-_UP |
| Tmem205   | 1.56425955 | 0.00188855 | Mtm1y/-_UP |
| Nipsnap3b | 1.56750325 | 0.00239301 | Mtm1y/-_UP |
| Ggct      | 1.5695084  | 0.0479298  | Mtm1y/-_UP |
| Cfh       | 1.57327302 | 0.00659322 | Mtm1y/-_UP |
| Itih3     | 1.5808134  | 0.00659322 | Mtm1y/-_UP |
| Ckap4     | 1.58531517 | 0.00398026 | Mtm1y/-_UP |
| Nudt16    | 1.58668253 | 0.00995555 | Mtm1y/-_UP |
| Art5      | 1.59502677 | 0.04158341 | Mtm1y/-_UP |
| Atp5if1   | 1.59653654 | 0.00488558 | Mtm1y/-_UP |
| Aif1l     | 1.60889694 | 0.04724515 | Mtm1y/-_UP |
| Pgam5     | 1.61006079 | 0.00267155 | Mtm1y/-_UP |
| Crip1     | 1.61911645 | 0.02112543 | Mtm1y/-_UP |
| Tmbim1    | 1.6233836  | 0.02533961 | Mtm1y/-_UP |
| Srsf3     | 1.63759504 | 0.00122395 | Mtm1y/-_UP |

|          |            |            |            |
|----------|------------|------------|------------|
| Rhoc     | 1.6464641  | 0.00322728 | Mtm1y/-_UP |
| Ftl1     | 1.64770618 | 0.01241385 | Mtm1y/-_UP |
| Sod3     | 1.65894213 | 0.00068774 | Mtm1y/-_UP |
| Dsg1a    | 1.66209278 | 0.03352086 | Mtm1y/-_UP |
| Islr     | 1.67671368 | 0.02152821 | Mtm1y/-_UP |
| Asl      | 1.67859886 | 0.01347994 | Mtm1y/-_UP |
| Gnai1    | 1.67866344 | 0.02927877 | Mtm1y/-_UP |
| Thbs4    | 1.68014688 | 0.03427583 | Mtm1y/-_UP |
| Gpc1     | 1.68070709 | 0.00060035 | Mtm1y/-_UP |
| Trpd52l3 | 1.68379729 | 0.00362666 | Mtm1y/-_UP |
| Man2a2   | 1.68621775 | 0.00020823 | Mtm1y/-_UP |
| Smoc2    | 1.68631118 | 0.00686895 | Mtm1y/-_UP |
| Atp2a1   | 1.69154866 | 0.00188855 | Mtm1y/-_UP |
| Tgm3     | 1.69303538 | 0.03307256 | Mtm1y/-_UP |
| Cstb     | 1.69543143 | 0.00060035 | Mtm1y/-_UP |
| Manf     | 1.70123533 | 0.00296904 | Mtm1y/-_UP |
| Ighg3    | 1.70157576 | 0.02984739 | Mtm1y/-_UP |
| Nup133   | 1.70628985 | 0.00795739 | Mtm1y/-_UP |
| S100a3   | 1.70744469 | 0.00083054 | Mtm1y/-_UP |
| Cygb     | 1.71007457 | 0.00361646 | Mtm1y/-_UP |
| Krt1     | 1.72596726 | 0.03629378 | Mtm1y/-_UP |
| Ctsz     | 1.72769885 | 0.02463229 | Mtm1y/-_UP |
| Sort1    | 1.73571794 | 0.00798022 | Mtm1y/-_UP |
| Ighg2b   | 1.74271038 | 0.03142177 | Mtm1y/-_UP |
| Mlf2     | 1.74340098 | 0.03426089 | Mtm1y/-_UP |
| Lgals1   | 1.75113031 | 0.00245855 | Mtm1y/-_UP |
| Dclk1    | 1.75574655 | 0.02441758 | Mtm1y/-_UP |
| Ifitm3   | 1.76827359 | 0.01327865 | Mtm1y/-_UP |
| Ccdc134  | 1.78351799 | 0.00083054 | Mtm1y/-_UP |
| Kdelr2   | 1.7977712  | 0.03098347 | Mtm1y/-_UP |
| Tgfb3    | 1.80292554 | 0.00581109 | Mtm1y/-_UP |
| Uchl1    | 1.80456313 | 0.01435037 | Mtm1y/-_UP |

|          |            |            |            |
|----------|------------|------------|------------|
| Htra1    | 1.81652725 | 0.01010781 | Mtm1y/-_UP |
| Mvp      | 1.81833359 | 0.03653964 | Mtm1y/-_UP |
| Slc25a24 | 1.82190645 | 0.0007367  | Mtm1y/-_UP |
| Krt77    | 1.82277925 | 0.03098856 | Mtm1y/-_UP |
| Snx4     | 1.82348448 | 0.01241385 | Mtm1y/-_UP |
| Efemp2   | 1.84885042 | 0.00775603 | Mtm1y/-_UP |
| Cd93     | 1.8513715  | 0.00208361 | Mtm1y/-_UP |
| Pbxip1   | 1.85444188 | 0.00020823 | Mtm1y/-_UP |
| Htati2   | 1.85521223 | 0.00084105 | Mtm1y/-_UP |
| Homer2   | 1.86373781 | 0.017533   | Mtm1y/-_UP |
| Hmcn2    | 1.86661675 | 0.00105906 | Mtm1y/-_UP |
| Bves     | 1.87051941 | 0.00520904 | Mtm1y/-_UP |
| Myoc     | 1.87859487 | 0.01665419 | Mtm1y/-_UP |
| Mgl2     | 1.88070507 | 0.0190986  | Mtm1y/-_UP |
| Pvalb    | 1.88256295 | 0.01348706 | Mtm1y/-_UP |
| Mmp2     | 1.88271119 | 0.00980885 | Mtm1y/-_UP |
| Atp1b4   | 1.90041517 | 0.00239301 | Mtm1y/-_UP |
| Gpc4     | 1.91493906 | 0.00014747 | Mtm1y/-_UP |
| Cotl1    | 1.9223175  | 0.01051887 | Mtm1y/-_UP |
| Mustn1   | 1.92749951 | 0.01072829 | Mtm1y/-_UP |
| F13b     | 1.93232394 | 0.01156646 | Mtm1y/-_UP |
| Trim35   | 1.93545386 | 0.0075836  | Mtm1y/-_UP |
| S100a13  | 1.9524323  | 0.01759689 | Mtm1y/-_UP |
| Rnase4   | 1.96139469 | 0.03977552 | Mtm1y/-_UP |
| Coa5     | 1.96584196 | 0.03410725 | Mtm1y/-_UP |
| Cst6     | 2.00794858 | 0.02313052 | Mtm1y/-_UP |
| Cfp      | 2.01631491 | 0.00182998 | Mtm1y/-_UP |
| Igkc     | 2.02404224 | 0.00523129 | Mtm1y/-_UP |
| Rrad     | 2.02472882 | 0.00342091 | Mtm1y/-_UP |
| Pld3     | 2.02560844 | 0.00105906 | Mtm1y/-_UP |
| Sppl2a   | 2.04666515 | 0.02441758 | Mtm1y/-_UP |
| Tubb6    | 2.06216701 | 0.0008734  | Mtm1y/-_UP |

|           |            |            |            |
|-----------|------------|------------|------------|
| Ccn1      | 2.0774102  | 0.01044491 | Mtm1y/-_UP |
| Ccdc124   | 2.078657   | 0.03353802 | Mtm1y/-_UP |
| Emb       | 2.10832164 | 0.02198061 | Mtm1y/-_UP |
| Atp1b2    | 2.13046209 | 0.00114512 | Mtm1y/-_UP |
| Gpx8      | 2.1359985  | 0.00131135 | Mtm1y/-_UP |
| Sirpa     | 2.14305088 | 0.00438691 | Mtm1y/-_UP |
| Klk8      | 2.16472709 | 0.01934597 | Mtm1y/-_UP |
| Srpx2     | 2.16536796 | 0.02328049 | Mtm1y/-_UP |
| Aebp1     | 2.18860167 | 0.00011985 | Mtm1y/-_UP |
| Man1b1    | 2.19125674 | 0.02528407 | Mtm1y/-_UP |
| Tgfbr1    | 2.19406654 | 0.02119231 | Mtm1y/-_UP |
| Tgm5      | 2.2054016  | 0.03139357 | Mtm1y/-_UP |
| Sprr1a    | 2.22096429 | 0.0471571  | Mtm1y/-_UP |
| Myh3      | 2.23673321 | 0.0156417  | Mtm1y/-_UP |
| Cacng1    | 2.33130294 | 0.0007367  | Mtm1y/-_UP |
| Maged2    | 2.34243233 | 0.00266057 | Mtm1y/-_UP |
| Map2k1    | 2.34783287 | 0.0441642  | Mtm1y/-_UP |
| Mfap4     | 2.35071452 | 0.02669682 | Mtm1y/-_UP |
| Dapk2     | 2.35924001 | 0.00987415 | Mtm1y/-_UP |
| App       | 2.36650526 | 0.00083054 | Mtm1y/-_UP |
| Pdlim3    | 2.38106436 | 0.0002145  | Mtm1y/-_UP |
| Aldh3b2   | 2.38923812 | 0.02387853 | Mtm1y/-_UP |
| Ighg      | 2.3928067  | 0.01212165 | Mtm1y/-_UP |
| Capns2    | 2.39580238 | 0.01069212 | Mtm1y/-_UP |
| H2-Ab1    | 2.41238358 | 0.0014059  | Mtm1y/-_UP |
| Sfrp1     | 2.43270628 | 0.02119231 | Mtm1y/-_UP |
| Igkv12-41 | 2.4352205  | 0.00781883 | Mtm1y/-_UP |
| Siglec1   | 2.44156137 | 0.03352086 | Mtm1y/-_UP |
| Csrp3     | 2.45688195 | 2.69E-05   | Mtm1y/-_UP |
| Cdc42     | 2.49194873 | 0.00083054 | Mtm1y/-_UP |
| Anxa1     | 2.5119455  | 0.00020823 | Mtm1y/-_UP |
| Nagpa     | 2.52356015 | 0.03991485 | Mtm1y/-_UP |

|               |            |            |            |
|---------------|------------|------------|------------|
| Angptl7       | 2.58178428 | 0.00697713 | Mtm1y/-_UP |
| Ncam1         | 2.58657789 | 0.00276198 | Mtm1y/-_UP |
| Apcs          | 2.5996147  | 0.0074526  | Mtm1y/-_UP |
| Myh4          | 2.63025019 | 0.00239301 | Mtm1y/-_UP |
| Postn         | 2.6574028  | 0.00497276 | Mtm1y/-_UP |
| Tspo          | 2.66903537 | 0.00029737 | Mtm1y/-_UP |
| Mgat2         | 2.68083723 | 0.00175179 | Mtm1y/-_UP |
| Gsn           | 2.68182176 | 0.00529698 | Mtm1y/-_UP |
| Angptl2       | 2.71760198 | 0.00266057 | Mtm1y/-_UP |
| Cfhr2         | 2.71904913 | 0.00235121 | Mtm1y/-_UP |
| Myo18a        | 2.75479451 | 0.02984739 | Mtm1y/-_UP |
| Glipr2        | 2.76456158 | 0.00083054 | Mtm1y/-_UP |
| Cilp          | 2.79526721 | 0.00105906 | Mtm1y/-_UP |
| Igsf1         | 2.79819495 | 0.02519805 | Mtm1y/-_UP |
| Stim2         | 2.81454443 | 0.01261633 | Mtm1y/-_UP |
| Casp3         | 2.81840127 | 0.00036027 | Mtm1y/-_UP |
| Rac2          | 2.85069179 | 0.0170995  | Mtm1y/-_UP |
| Gabarapl1     | 2.85195725 | 0.03423471 | Mtm1y/-_UP |
| Fabp1         | 2.85535715 | 0.02325362 | Mtm1y/-_UP |
| Nes           | 2.87632371 | 0.02048988 | Mtm1y/-_UP |
| Serpib1a      | 2.93502788 | 2.70E-05   | Mtm1y/-_UP |
| Loxl1         | 2.97212536 | 0.00175179 | Mtm1y/-_UP |
| 9530068E07Rik | 3.06487382 | 0.00214749 | Mtm1y/-_UP |
| Rab31         | 3.0719936  | 0.00900481 | Mtm1y/-_UP |
| Gsn           | 3.12030416 | 5.88E-05   | Mtm1y/-_UP |
| Fcgr2b        | 3.16064412 | 0.00532202 | Mtm1y/-_UP |
| Cd1d1         | 3.19133072 | 0.00862642 | Mtm1y/-_UP |
| Fbxo25        | 3.23054798 | 8.24E-06   | Mtm1y/-_UP |
| Gtf2a1        | 3.2500032  | 0.01154283 | Mtm1y/-_UP |
| Tnfrsf23      | 3.4156461  | 0.00022464 | Mtm1y/-_UP |
| S100a4        | 3.4365655  | 0.00021304 | Mtm1y/-_UP |
| Cpne2         | 3.48704933 | 2.70E-05   | Mtm1y/-_UP |

|          |            |            |            |
|----------|------------|------------|------------|
| Ugt2b1   | 3.50953461 | 0.00266057 | Mtm1y/-_UP |
| Gosr2    | 3.51755199 | 0.01418257 | Mtm1y/-_UP |
| Lemd3    | 3.52561782 | 0.00020823 | Mtm1y/-_UP |
| Mybph    | 3.69587495 | 0.01686942 | Mtm1y/-_UP |
| Cx3cl1   | 3.73981817 | 0.00015212 | Mtm1y/-_UP |
| Obsl1    | 3.96334151 | 5.35E-05   | Mtm1y/-_UP |
| Mmgt1    | 3.98574157 | 0.00267847 | Mtm1y/-_UP |
| Igkv6-13 | 4.01202402 | 0.00835232 | Mtm1y/-_UP |
| Basp1    | 4.10615588 | 0.03833509 | Mtm1y/-_UP |
| Ankrd1   | 4.20394444 | 0.01014297 | Mtm1y/-_UP |
| Sesn1    | 4.26798052 | 5.35E-05   | Mtm1y/-_UP |
| Cd99     | 4.44543674 | 0.01609468 | Mtm1y/-_UP |
| Hjv      | 4.63800663 | 9.44E-08   | Mtm1y/-_UP |
| Tnnt3    | 4.71607945 | 0.00139121 | Mtm1y/-_UP |

**Table S4: Mouse global untargeted proteomics analysis where Mtm1<sup>y/-</sup> with mava treatment are compared to Mtm1<sup>y/-</sup> with vehicle.**

| protein_identifier | log2FC     | padj       | direction       |
|--------------------|------------|------------|-----------------|
| Psmc12             | 4.58448677 | 0.00073584 | Mtm1y/-_mava_UP |
| Rbm3               | 4.58013427 | 0.00327293 | Mtm1y/-_mava_UP |
| Kcnq5              | 4.27552284 | 0.00073584 | Mtm1y/-_mava_UP |
| Ankrd1             | 3.96600414 | 0.03287858 | Mtm1y/-_mava_UP |
| Nagpa              | 3.89117963 | 0.02945975 | Mtm1y/-_mava_UP |
| Tnnt3              | 3.88436677 | 0.00577795 | Mtm1y/-_mava_UP |
| Snx13              | 3.54019354 | 0.0072178  | Mtm1y/-_mava_UP |
| Dhx30              | 3.40008693 | 0.02379928 | Mtm1y/-_mava_UP |
| H2-Aa              | 3.22269054 | 0.03896879 | Mtm1y/-_mava_UP |
| Sesn1              | 3.11722752 | 0.04173617 | Mtm1y/-_mava_UP |
| S100a4             | 3.07965591 | 0.00833012 | Mtm1y/-_mava_UP |
| Fcgr2b             | 3.04937262 | 0.00327293 | Mtm1y/-_mava_UP |
| Cd1d1              | 2.94933101 | 0.01201662 | Mtm1y/-_mava_UP |
| Tnfrsf23           | 2.93770382 | 0.01101861 | Mtm1y/-_mava_UP |
| Hax1               | 2.92250071 | 0.00159695 | Mtm1y/-_mava_UP |
| Atg9b              | 2.91295329 | 0.00937694 | Mtm1y/-_mava_UP |
| Anxa1              | 2.88490514 | 0.00095756 | Mtm1y/-_mava_UP |
| 1110025L11Rik      | 2.79352361 | 0.02945975 | Mtm1y/-_mava_UP |
| Sphk1              | 2.73264967 | 0.01054988 | Mtm1y/-_mava_UP |
| Cpne2              | 2.64217021 | 0.00147399 | Mtm1y/-_mava_UP |
| Cdc42              | 2.63998109 | 0.0115834  | Mtm1y/-_mava_UP |
| Apcs               | 2.60279576 | 0.03872253 | Mtm1y/-_mava_UP |
| St6galnac4         | 2.54269035 | 0.01054988 | Mtm1y/-_mava_UP |
| Nefm               | 2.53416126 | 0.00252465 | Mtm1y/-_mava_UP |
| Cfhr2              | 2.50714253 | 0.00833012 | Mtm1y/-_mava_UP |
| Bid                | 2.47599543 | 0.00183054 | Mtm1y/-_mava_UP |
| Slc2a1             | 2.47302807 | 0.0231481  | Mtm1y/-_mava_UP |
| Trio               | 2.46891125 | 0.0380044  | Mtm1y/-_mava_UP |
| Abhd14a            | 2.45886182 | 0.03110528 | Mtm1y/-_mava_UP |

|          |            |            |                 |
|----------|------------|------------|-----------------|
| Ptpn4    | 2.41547643 | 0.0231481  | Mtm1y/-_mava_UP |
| Gsn      | 2.41212096 | 0.00252465 | Mtm1y/-_mava_UP |
| Ptprc    | 2.326849   | 0.03079169 | Mtm1y/-_mava_UP |
| Mstn     | 2.32028359 | 0.03953035 | Mtm1y/-_mava_UP |
| Ugdh     | 2.29942506 | 0.00993482 | Mtm1y/-_mava_UP |
| Ighg2b   | 2.17750602 | 0.03732973 | Mtm1y/-_mava_UP |
| Pdpn     | 2.15954519 | 0.02685    | Mtm1y/-_mava_UP |
| Htra1    | 2.1058864  | 0.02928864 | Mtm1y/-_mava_UP |
| Cilp     | 2.07684505 | 0.0046157  | Mtm1y/-_mava_UP |
| Angptl2  | 2.05807492 | 0.00689157 | Mtm1y/-_mava_UP |
| Icam1    | 2.03905425 | 0.00259342 | Mtm1y/-_mava_UP |
| Alox8    | 2.03222507 | 0.0380044  | Mtm1y/-_mava_UP |
| Ncam1    | 2.02393456 | 0.01413484 | Mtm1y/-_mava_UP |
| Serpib1a | 1.99621246 | 0.00108197 | Mtm1y/-_mava_UP |
| Dapk2    | 1.90098824 | 0.04873443 | Mtm1y/-_mava_UP |
| Fst      | 1.90010578 | 0.01395387 | Mtm1y/-_mava_UP |
| Sumo2    | 1.88288327 | 0.01250683 | Mtm1y/-_mava_UP |
| Hmcn2    | 1.84349433 | 0.00743984 | Mtm1y/-_mava_UP |
| Mfap4    | 1.83520039 | 0.02316214 | Mtm1y/-_mava_UP |
| Gsn      | 1.82751947 | 0.00351213 | Mtm1y/-_mava_UP |
| App      | 1.81704652 | 0.0072178  | Mtm1y/-_mava_UP |
| Postn    | 1.76720483 | 0.04173617 | Mtm1y/-_mava_UP |
| Myoc     | 1.72736653 | 0.02580589 | Mtm1y/-_mava_UP |
| Gpc4     | 1.71819276 | 0.00141591 | Mtm1y/-_mava_UP |
| Mrc2     | 1.71113083 | 0.04367501 | Mtm1y/-_mava_UP |
| Fbln5    | 1.70700682 | 0.00804264 | Mtm1y/-_mava_UP |
| Gpc1     | 1.69748726 | 0.00159695 | Mtm1y/-_mava_UP |
| Clec3b   | 1.68391319 | 0.03719104 | Mtm1y/-_mava_UP |
| Fbln2    | 1.68068227 | 0.00272289 | Mtm1y/-_mava_UP |
| Pvalb    | 1.64015482 | 0.00247626 | Mtm1y/-_mava_UP |
| Sirpa    | 1.63498854 | 0.03079169 | Mtm1y/-_mava_UP |
| Tspan13  | 1.62480473 | 0.01682057 | Mtm1y/-_mava_UP |

|          |            |            |                 |
|----------|------------|------------|-----------------|
| Tubb4a   | 1.57309341 | 0.04467349 | Mtm1y/-_mava_UP |
| Cacng1   | 1.558586   | 0.00252465 | Mtm1y/-_mava_UP |
| Igf2     | 1.5585495  | 0.03841067 | Mtm1y/-_mava_UP |
| Csrp3    | 1.55761263 | 0.00138515 | Mtm1y/-_mava_UP |
| Adgre5   | 1.55669166 | 0.01035752 | Mtm1y/-_mava_UP |
| Galnt7   | 1.5259334  | 0.00554392 | Mtm1y/-_mava_UP |
| Anpep    | 1.49629276 | 0.01152397 | Mtm1y/-_mava_UP |
| Aebp1    | 1.49329036 | 0.04784845 | Mtm1y/-_mava_UP |
| Pld3     | 1.49258983 | 0.01249066 | Mtm1y/-_mava_UP |
| Idua     | 1.48387219 | 0.02685    | Mtm1y/-_mava_UP |
| Tmem43   | 1.48284585 | 0.00095756 | Mtm1y/-_mava_UP |
| Ftl1     | 1.45705157 | 0.0115834  | Mtm1y/-_mava_UP |
| Mlf2     | 1.44028048 | 0.03616541 | Mtm1y/-_mava_UP |
| Sod3     | 1.43194742 | 0.00764202 | Mtm1y/-_mava_UP |
| Acbd4    | 1.4171112  | 0.01208861 | Mtm1y/-_mava_UP |
| Ighv1-31 | 1.4060764  | 0.04199433 | Mtm1y/-_mava_UP |
| Lrrn1    | 1.35600401 | 0.02580589 | Mtm1y/-_mava_UP |
| Rrad     | 1.34151851 | 0.0466877  | Mtm1y/-_mava_UP |
| Cd55     | 1.31624255 | 0.0093814  | Mtm1y/-_mava_UP |
| Sort1    | 1.28572175 | 0.02399908 | Mtm1y/-_mava_UP |
| Igf1r    | 1.27527774 | 0.04212742 | Mtm1y/-_mava_UP |
| Slc38a2  | 1.24082147 | 0.04270581 | Mtm1y/-_mava_UP |
| F13a1    | 1.23312749 | 0.01826273 | Mtm1y/-_mava_UP |
| Cspg4    | 1.22751937 | 0.03841067 | Mtm1y/-_mava_UP |
| Trrap    | 1.22084072 | 0.03423478 | Mtm1y/-_mava_UP |
| Egf      | 1.20005188 | 0.03682983 | Mtm1y/-_mava_UP |
| Hrg      | 1.19381007 | 0.01208861 | Mtm1y/-_mava_UP |
| S100a13  | 1.18431547 | 0.03590132 | Mtm1y/-_mava_UP |
| Fbln1    | 1.16808302 | 0.02702681 | Mtm1y/-_mava_UP |
| P2rx4    | 1.1659419  | 0.00950415 | Mtm1y/-_mava_UP |
| Efemp1   | 1.1612794  | 0.01255472 | Mtm1y/-_mava_UP |
| Cd302    | 1.16050048 | 0.01083021 | Mtm1y/-_mava_UP |

|            |            |            |                 |
|------------|------------|------------|-----------------|
| Camk2d     | 1.1592291  | 0.00259342 | Mtm1y/-_mava_UP |
| Rer1       | 1.15699898 | 0.00592465 | Mtm1y/-_mava_UP |
| Mrc1       | 1.15478652 | 0.03110528 | Mtm1y/-_mava_UP |
| Zbed5      | 1.15290182 | 0.03241036 | Mtm1y/-_mava_UP |
| Cpd        | 1.13790571 | 0.01248175 | Mtm1y/-_mava_UP |
| Pdlim3     | 1.13350582 | 0.01575707 | Mtm1y/-_mava_UP |
| Fn1        | 1.12722652 | 0.03399526 | Mtm1y/-_mava_UP |
| Man1a      | 1.11536204 | 0.03938264 | Mtm1y/-_mava_UP |
| Cyb5r3     | 1.11327549 | 0.00247626 | Mtm1y/-_mava_UP |
| Aspn       | 1.11290219 | 0.01248175 | Mtm1y/-_mava_UP |
| Atp1b2     | 1.11118021 | 0.0306521  | Mtm1y/-_mava_UP |
| Pbxip1     | 1.10025322 | 0.01208861 | Mtm1y/-_mava_UP |
| Galnt1     | 1.09215759 | 0.04400264 | Mtm1y/-_mava_UP |
| Chrnbl     | 1.09048347 | 0.00263722 | Mtm1y/-_mava_UP |
| Zfp11      | 1.08342855 | 0.04200771 | Mtm1y/-_mava_UP |
| Cd82       | 1.07550427 | 0.01248175 | Mtm1y/-_mava_UP |
| Cfh        | 1.06472847 | 0.03938264 | Mtm1y/-_mava_UP |
| Smoc2      | 1.06305616 | 0.03399526 | Mtm1y/-_mava_UP |
| Ckap4      | 1.05681542 | 0.03399526 | Mtm1y/-_mava_UP |
| Pycr1      | 1.05493077 | 0.0180655  | Mtm1y/-_mava_UP |
| Plxnb2     | 1.03365601 | 0.01094496 | Mtm1y/-_mava_UP |
| Gpx3       | 1.03313982 | 0.02922444 | Mtm1y/-_mava_UP |
| Api5       | 1.03309839 | 0.00950415 | Mtm1y/-_mava_UP |
| Anxa7      | 1.0156852  | 0.0128913  | Mtm1y/-_mava_UP |
| Cybc1      | 1.00117213 | 0.02722259 | Mtm1y/-_mava_UP |
| Ints3      | 0.99745888 | 0.04849993 | Mtm1y/-_mava_UP |
| Cfd        | 0.99121474 | 0.0380044  | Mtm1y/-_mava_UP |
| Mtdh       | 0.98756483 | 0.04985887 | Mtm1y/-_mava_UP |
| Cstb       | 0.98182859 | 0.0380044  | Mtm1y/-_mava_UP |
| Shisa4     | 0.97514332 | 0.02580589 | Mtm1y/-_mava_UP |
| Csgalnact2 | 0.9712431  | 0.01248175 | Mtm1y/-_mava_UP |
| Ahsg       | 0.96815117 | 0.00832906 | Mtm1y/-_mava_UP |

|          |            |            |                 |
|----------|------------|------------|-----------------|
| Ehbp111  | 0.96420895 | 0.02945975 | Mtm1y/-_mava_UP |
| Pon2     | 0.96046655 | 0.00247626 | Mtm1y/-_mava_UP |
| Acot9    | 0.95566699 | 0.00360984 | Mtm1y/-_mava_UP |
| Ppib     | 0.9555109  | 0.0291608  | Mtm1y/-_mava_UP |
| Serpib6a | 0.94939989 | 0.01115596 | Mtm1y/-_mava_UP |
| Slc25a24 | 0.94546818 | 0.01618993 | Mtm1y/-_mava_UP |
| Esyt1    | 0.94165765 | 0.00804264 | Mtm1y/-_mava_UP |
| Sigmar1  | 0.93753165 | 0.01350456 | Mtm1y/-_mava_UP |
| Mix23    | 0.92717754 | 0.04763086 | Mtm1y/-_mava_UP |
| Pgrmc2   | 0.92077237 | 0.01582179 | Mtm1y/-_mava_UP |
| Itm2b    | 0.91731065 | 0.01248175 | Mtm1y/-_mava_UP |
| Anxa4    | 0.91686529 | 0.01198306 | Mtm1y/-_mava_UP |
| Hprt1    | 0.90362724 | 0.02922444 | Mtm1y/-_mava_UP |
| Mrpl12   | 0.90092233 | 0.02593608 | Mtm1y/-_mava_UP |
| Itga5    | 0.88737128 | 0.03075888 | Mtm1y/-_mava_UP |
| Lgals1   | 0.87468084 | 0.02838532 | Mtm1y/-_mava_UP |
| Man1a2   | 0.86484409 | 0.03953035 | Mtm1y/-_mava_UP |
| Tm9sf3   | 0.85584704 | 0.03399526 | Mtm1y/-_mava_UP |
| Cst3     | 0.85046675 | 0.01522854 | Mtm1y/-_mava_UP |
| Ergic1   | 0.84043861 | 0.0128913  | Mtm1y/-_mava_UP |
| Myl4     | 0.83876501 | 0.03286073 | Mtm1y/-_mava_UP |
| Ptgfrn   | 0.82542179 | 0.02722259 | Mtm1y/-_mava_UP |
| Esyt2    | 0.82014423 | 0.00833012 | Mtm1y/-_mava_UP |
| Dusp29   | 0.81411698 | 0.04427036 | Mtm1y/-_mava_UP |
| Txn2     | 0.80778471 | 0.04640974 | Mtm1y/-_mava_UP |
| Galnt2   | 0.8045045  | 0.01738698 | Mtm1y/-_mava_UP |
| Epb4112  | 0.80253248 | 0.01250683 | Mtm1y/-_mava_UP |
| Camk2a   | 0.7991676  | 0.00247626 | Mtm1y/-_mava_UP |
| B3galnt2 | 0.79326105 | 0.02580589 | Mtm1y/-_mava_UP |
| Lamtor1  | 0.79312368 | 0.01522854 | Mtm1y/-_mava_UP |
| Lman2    | 0.79217276 | 0.00950415 | Mtm1y/-_mava_UP |
| Cpt1a    | 0.78852693 | 0.03132115 | Mtm1y/-_mava_UP |

|         |            |            |                 |
|---------|------------|------------|-----------------|
| Tmed5   | 0.78325783 | 0.00095756 | Mtm1y/-_mava_UP |
| Pdlim7  | 0.78265034 | 0.02722259 | Mtm1y/-_mava_UP |
| Rnf121  | 0.77079129 | 0.02580589 | Mtm1y/-_mava_UP |
| Ucp3    | 0.76837802 | 0.04205609 | Mtm1y/-_mava_UP |
| Nenf    | 0.74439396 | 0.03719104 | Mtm1y/-_mava_UP |
| Ncbp1   | 0.74363654 | 0.04173617 | Mtm1y/-_mava_UP |
| Wls     | 0.7325584  | 0.0380044  | Mtm1y/-_mava_UP |
| Erlin1  | 0.72566368 | 0.032724   | Mtm1y/-_mava_UP |
| Cyp20a1 | 0.72534973 | 0.04784845 | Mtm1y/-_mava_UP |
| Letmd1  | 0.71306615 | 0.02726272 | Mtm1y/-_mava_UP |
| Kyat3   | 0.71201812 | 0.0334782  | Mtm1y/-_mava_UP |
| Calu    | 0.70820257 | 0.03399526 | Mtm1y/-_mava_UP |
| Sel1l   | 0.70280043 | 0.0306521  | Mtm1y/-_mava_UP |
| Igf2r   | 0.70163905 | 0.03179303 | Mtm1y/-_mava_UP |
| Rras    | 0.70014735 | 0.01878399 | Mtm1y/-_mava_UP |
| Cyb5a   | 0.69812305 | 0.0380044  | Mtm1y/-_mava_UP |
| Anxa2   | 0.69357958 | 0.03605885 | Mtm1y/-_mava_UP |
| Prnp    | 0.69324986 | 0.04771466 | Mtm1y/-_mava_UP |
| Yme1l1  | 0.6821125  | 0.032724   | Mtm1y/-_mava_UP |
| Spcs1   | 0.68091009 | 0.03286073 | Mtm1y/-_mava_UP |
| Cd59a   | 0.67777157 | 0.02351433 | Mtm1y/-_mava_UP |
| Sdf4    | 0.67748269 | 0.032724   | Mtm1y/-_mava_UP |
| Arhgap1 | 0.67556161 | 0.04917648 | Mtm1y/-_mava_UP |
| Vwa5a   | 0.67436013 | 0.04173617 | Mtm1y/-_mava_UP |
| Nucb1   | 0.67336746 | 0.00967766 | Mtm1y/-_mava_UP |
| Spcs2   | 0.67239383 | 0.03731563 | Mtm1y/-_mava_UP |
| Man2a2  | 0.67211074 | 0.03286073 | Mtm1y/-_mava_UP |
| Tnxb    | 0.66573903 | 0.03953035 | Mtm1y/-_mava_UP |
| Apoa4   | 0.66145005 | 0.03244114 | Mtm1y/-_mava_UP |
| Tm9sf2  | 0.65992078 | 0.032724   | Mtm1y/-_mava_UP |
| Itga7   | 0.65749932 | 0.03731563 | Mtm1y/-_mava_UP |
| Jsrp1   | 0.64278382 | 0.01250683 | Mtm1y/-_mava_UP |

|          |            |            |                 |
|----------|------------|------------|-----------------|
| Atp6v0d1 | 0.64017815 | 0.03132115 | Mtm1y/-_mava_UP |
| Stt3a    | 0.63811936 | 0.02238831 | Mtm1y/-_mava_UP |
| Cdh13    | 0.63779769 | 0.03710251 | Mtm1y/-_mava_UP |
| Aldh4a1  | 0.63752715 | 0.03082845 | Mtm1y/-_mava_UP |
| Pgam5    | 0.6348368  | 0.04985887 | Mtm1y/-_mava_UP |
| Lamp1    | 0.63367023 | 0.03079169 | Mtm1y/-_mava_UP |
| Ergic2   | 0.63313685 | 0.02495272 | Mtm1y/-_mava_UP |
| Mrpl48   | 0.63218696 | 0.02196788 | Mtm1y/-_mava_UP |
| Anxa11   | 0.63071791 | 0.02278029 | Mtm1y/-_mava_UP |
| Ociad2   | 0.62479693 | 0.04173617 | Mtm1y/-_mava_UP |
| Pon3     | 0.62442446 | 0.01717573 | Mtm1y/-_mava_UP |
| Aldh2    | 0.62258672 | 0.01115596 | Mtm1y/-_mava_UP |
| Rapsn    | 0.61584803 | 0.03079169 | Mtm1y/-_mava_UP |
| Tpt1     | 0.61262409 | 0.02673023 | Mtm1y/-_mava_UP |
| Hsd17b12 | 0.61036031 | 0.04047612 | Mtm1y/-_mava_UP |
| Mcat     | 0.60298622 | 0.04167129 | Mtm1y/-_mava_UP |
| Slc3a2   | 0.60091933 | 0.03079169 | Mtm1y/-_mava_UP |
| Prkca    | 0.58696062 | 0.03365849 | Mtm1y/-_mava_UP |
| Atp6v0a1 | 0.58448245 | 0.01208193 | Mtm1y/-_mava_UP |
| Cyp27a1  | 0.58308177 | 0.00327293 | Mtm1y/-_mava_UP |
| Rcn2     | 0.57727615 | 0.04985887 | Mtm1y/-_mava_UP |
| Cemip2   | 0.5762159  | 0.01035752 | Mtm1y/-_mava_UP |
| Adpgk    | 0.57145898 | 0.02884408 | Mtm1y/-_mava_UP |
| Tmed9    | 0.56954241 | 0.04173617 | Mtm1y/-_mava_UP |
| Lman2l   | 0.5660261  | 0.02945975 | Mtm1y/-_mava_UP |
| Mcu      | 0.55650285 | 0.00327293 | Mtm1y/-_mava_UP |
| Trmu     | 0.55589469 | 0.03399526 | Mtm1y/-_mava_UP |
| Bcam     | 0.55175218 | 0.0302593  | Mtm1y/-_mava_UP |
| Coq3     | 0.54947291 | 0.03655078 | Mtm1y/-_mava_UP |
| Micu1    | 0.54692648 | 0.00863765 | Mtm1y/-_mava_UP |
| Fech     | 0.53921187 | 0.01826273 | Mtm1y/-_mava_UP |
| Mogs     | 0.51769402 | 0.03179303 | Mtm1y/-_mava_UP |

|            |            |            |                 |
|------------|------------|------------|-----------------|
| Ssr4       | 0.51339691 | 0.04047612 | Mtm1y/-_mava_UP |
| Alg9       | 0.51276766 | 0.02945975 | Mtm1y/-_mava_UP |
| Oxa1l      | 0.49133946 | 0.03110528 | Mtm1y/-_mava_UP |
| Mrpl18     | 0.48163006 | 0.02928864 | Mtm1y/-_mava_UP |
| Rab7a      | 0.4798153  | 0.04889854 | Mtm1y/-_mava_UP |
| Tmx3       | 0.47602971 | 0.0380044  | Mtm1y/-_mava_UP |
| Gadd45gip1 | 0.47110556 | 0.04400264 | Mtm1y/-_mava_UP |
| Sypl1      | 0.46697394 | 0.02838532 | Mtm1y/-_mava_UP |
| Cox7a2l    | 0.46541296 | 0.01878399 | Mtm1y/-_mava_UP |
| Creld2     | 0.46365632 | 0.03953035 | Mtm1y/-_mava_UP |
| Tmed4      | 0.46172677 | 0.04973251 | Mtm1y/-_mava_UP |
| Asph       | 0.45611582 | 0.03287858 | Mtm1y/-_mava_UP |
| Insr       | 0.45228684 | 0.011056   | Mtm1y/-_mava_UP |
| Bpnt2      | 0.4512639  | 0.04934686 | Mtm1y/-_mava_UP |
| Pisd       | 0.4491727  | 0.01054988 | Mtm1y/-_mava_UP |
| Vwa8       | 0.44478596 | 0.04212742 | Mtm1y/-_mava_UP |
| Hars2      | 0.44414484 | 0.03953035 | Mtm1y/-_mava_UP |
| Coq5       | 0.44396984 | 0.03841067 | Mtm1y/-_mava_UP |
| Exoc6      | 0.4389292  | 0.04089006 | Mtm1y/-_mava_UP |
| Trmt10c    | 0.42923337 | 0.04244608 | Mtm1y/-_mava_UP |
| Pmpcb      | 0.42787765 | 0.01922885 | Mtm1y/-_mava_UP |
| Serhl      | 0.42539948 | 0.04047612 | Mtm1y/-_mava_UP |
| Lap3       | 0.42414544 | 0.02981121 | Mtm1y/-_mava_UP |
| Atp6v1a    | 0.41137067 | 0.04431824 | Mtm1y/-_mava_UP |
| Tmx1       | 0.39673093 | 0.02206077 | Mtm1y/-_mava_UP |
| Glud1      | 0.38310847 | 0.03841067 | Mtm1y/-_mava_UP |
| Emc7       | 0.37868029 | 0.04771466 | Mtm1y/-_mava_UP |
| Apmap      | 0.37308919 | 0.03423478 | Mtm1y/-_mava_UP |
| Surf1      | 0.37253189 | 0.04528368 | Mtm1y/-_mava_UP |
| Tor1aip2   | 0.35371262 | 0.04173617 | Mtm1y/-_mava_UP |
| Afg3l1     | 0.34966798 | 0.04346959 | Mtm1y/-_mava_UP |
| Oma1       | 0.3406843  | 0.0442381  | Mtm1y/-_mava_UP |

|          |            |            |                   |
|----------|------------|------------|-------------------|
| Dnaja3   | 0.31232132 | 0.03120039 | Mtm1y/-_mava_UP   |
| Rhot1    | 0.26007614 | 0.03421723 | Mtm1y/-_mava_UP   |
| Ndufaf1  | 0.25135908 | 0.03938264 | Mtm1y/-_mava_UP   |
| Mtch1    | 0.24940051 | 0.03682364 | Mtm1y/-_mava_UP   |
| Dhrs7c   | -0.3348381 | 0.03286073 | Mtm1y/-_mava_DOWN |
| Npepps   | -0.3432593 | 0.04173617 | Mtm1y/-_mava_DOWN |
| Ak1      | -0.3441734 | 0.02399059 | Mtm1y/-_mava_DOWN |
| Ndufa11  | -0.3574915 | 0.03731563 | Mtm1y/-_mava_DOWN |
| Map2k3   | -0.365489  | 0.03719104 | Mtm1y/-_mava_DOWN |
| Adss1    | -0.4184988 | 0.04491479 | Mtm1y/-_mava_DOWN |
| Nnt      | -0.4345337 | 0.04763086 | Mtm1y/-_mava_DOWN |
| Aifm2    | -0.4448066 | 0.01563767 | Mtm1y/-_mava_DOWN |
| Gars1    | -0.4838991 | 0.04047612 | Mtm1y/-_mava_DOWN |
| Scn4b    | -0.5093292 | 0.01325034 | Mtm1y/-_mava_DOWN |
| Actn4    | -0.5106431 | 0.01870792 | Mtm1y/-_mava_DOWN |
| Mpi      | -0.5311658 | 0.04985887 | Mtm1y/-_mava_DOWN |
| Eef1a2   | -0.5323937 | 0.02495272 | Mtm1y/-_mava_DOWN |
| Wdr46    | -0.5337958 | 0.03079169 | Mtm1y/-_mava_DOWN |
| Fastkd5  | -0.535516  | 0.02847494 | Mtm1y/-_mava_DOWN |
| Cct7     | -0.5486206 | 0.04784845 | Mtm1y/-_mava_DOWN |
| Ppm1b    | -0.5614673 | 0.01826273 | Mtm1y/-_mava_DOWN |
| Hspb6    | -0.569939  | 0.00252465 | Mtm1y/-_mava_DOWN |
| Mief2    | -0.573388  | 0.00554392 | Mtm1y/-_mava_DOWN |
| Uba1     | -0.5828556 | 0.00804264 | Mtm1y/-_mava_DOWN |
| Gstt2    | -0.5909551 | 0.03648723 | Mtm1y/-_mava_DOWN |
| Dnpep    | -0.5948549 | 0.01110058 | Mtm1y/-_mava_DOWN |
| Pfkm     | -0.6058917 | 0.04522551 | Mtm1y/-_mava_DOWN |
| Slc16a1  | -0.6100093 | 0.00073584 | Mtm1y/-_mava_DOWN |
| Capza2   | -0.6137933 | 0.01201662 | Mtm1y/-_mava_DOWN |
| Ephx2    | -0.6170597 | 0.01951477 | Mtm1y/-_mava_DOWN |
| Rap1gds1 | -0.6297301 | 0.01194908 | Mtm1y/-_mava_DOWN |
| Ppp2r1a  | -0.6320575 | 0.01835584 | Mtm1y/-_mava_DOWN |

|         |            |            |                   |
|---------|------------|------------|-------------------|
| Smpdl3b | -0.6393718 | 0.03319056 | Mtm1y/-_mava_DOWN |
| Ppp2ca  | -0.6472522 | 0.04047612 | Mtm1y/-_mava_DOWN |
| Eloc    | -0.6479663 | 0.02837548 | Mtm1y/-_mava_DOWN |
| Cul5    | -0.6565609 | 0.04047612 | Mtm1y/-_mava_DOWN |
| Ryr1    | -0.6586845 | 0.00833012 | Mtm1y/-_mava_DOWN |
| Pura    | -0.6622837 | 0.00252465 | Mtm1y/-_mava_DOWN |
| Pfkfb1  | -0.6630795 | 0.0180655  | Mtm1y/-_mava_DOWN |
| Psm2    | -0.6655308 | 0.032724   | Mtm1y/-_mava_DOWN |
| Prdx1   | -0.6732722 | 0.03079169 | Mtm1y/-_mava_DOWN |
| Rnf123  | -0.6915451 | 0.0072178  | Mtm1y/-_mava_DOWN |
| Dhrs11  | -0.6957445 | 0.02928864 | Mtm1y/-_mava_DOWN |
| Prkg1   | -0.7092293 | 0.03287858 | Mtm1y/-_mava_DOWN |
| Asrgl1  | -0.7098491 | 0.01035752 | Mtm1y/-_mava_DOWN |
| Twf2    | -0.7131016 | 0.0442381  | Mtm1y/-_mava_DOWN |
| Mavs    | -0.7335987 | 0.03110528 | Mtm1y/-_mava_DOWN |
| Abca7   | -0.738151  | 0.02945975 | Mtm1y/-_mava_DOWN |
| Cenpv   | -0.7387993 | 0.03086677 | Mtm1y/-_mava_DOWN |
| Fkbp11  | -0.7393931 | 0.01595423 | Mtm1y/-_mava_DOWN |
| Prxl2a  | -0.7504252 | 0.00536538 | Mtm1y/-_mava_DOWN |
| Mylk2   | -0.7537556 | 0.01529903 | Mtm1y/-_mava_DOWN |
| Washc5  | -0.7539384 | 0.00360984 | Mtm1y/-_mava_DOWN |
| Inpp4b  | -0.7579023 | 0.04173617 | Mtm1y/-_mava_DOWN |
| Kcna7   | -0.7586826 | 0.02280079 | Mtm1y/-_mava_DOWN |
| Gbe1    | -0.7599453 | 0.01859812 | Mtm1y/-_mava_DOWN |
| Scrn3   | -0.7646996 | 0.02280079 | Mtm1y/-_mava_DOWN |
| Dnm1l   | -0.7807132 | 0.0072178  | Mtm1y/-_mava_DOWN |
| Txnrd1  | -0.7872077 | 0.02206077 | Mtm1y/-_mava_DOWN |
| Thpp2   | -0.7939521 | 0.04183761 | Mtm1y/-_mava_DOWN |
| Cct2    | -0.7965501 | 0.03655078 | Mtm1y/-_mava_DOWN |
| Pgp     | -0.8263726 | 0.03181426 | Mtm1y/-_mava_DOWN |
| Ppp2r2a | -0.8353573 | 0.01899912 | Mtm1y/-_mava_DOWN |
| Ampd1   | -0.8361529 | 0.03399526 | Mtm1y/-_mava_DOWN |

|          |            |            |                   |
|----------|------------|------------|-------------------|
| Paics    | -0.8417737 | 0.02945975 | Mtm1y/-_mava_DOWN |
| Phyhd1   | -0.8423785 | 0.03901508 | Mtm1y/-_mava_DOWN |
| Cops6    | -0.8500049 | 0.03088294 | Mtm1y/-_mava_DOWN |
| Kcnma1   | -0.8629559 | 0.00354661 | Mtm1y/-_mava_DOWN |
| Nt5c2    | -0.8633373 | 0.02945975 | Mtm1y/-_mava_DOWN |
| Stac3    | -0.8671111 | 0.02270684 | Mtm1y/-_mava_DOWN |
| Man2c1   | -0.8721401 | 0.00950415 | Mtm1y/-_mava_DOWN |
| Pycr3    | -0.8792562 | 0.02047625 | Mtm1y/-_mava_DOWN |
| Mdh1     | -0.8793871 | 0.04173617 | Mtm1y/-_mava_DOWN |
| Tmod4    | -0.8849583 | 0.00252465 | Mtm1y/-_mava_DOWN |
| Stradb   | -0.8911723 | 0.03399526 | Mtm1y/-_mava_DOWN |
| Usp15    | -0.8968671 | 0.00776658 | Mtm1y/-_mava_DOWN |
| Slc25a13 | -0.9072967 | 0.00950415 | Mtm1y/-_mava_DOWN |
| Psemb6   | -0.9336085 | 0.00950415 | Mtm1y/-_mava_DOWN |
| Acot11   | -0.9457304 | 0.00259342 | Mtm1y/-_mava_DOWN |
| Lrrc38   | -0.9476772 | 0.03432218 | Mtm1y/-_mava_DOWN |
| Asb2     | -0.9500473 | 0.00833012 | Mtm1y/-_mava_DOWN |
| Phkb     | -0.9529516 | 0.01035752 | Mtm1y/-_mava_DOWN |
| Coro6    | -0.9642634 | 0.010434   | Mtm1y/-_mava_DOWN |
| Sh3bgr   | -0.9646561 | 0.00950415 | Mtm1y/-_mava_DOWN |
| Cops5    | -0.9721394 | 0.01208861 | Mtm1y/-_mava_DOWN |
| Zer1     | -0.985772  | 0.03286073 | Mtm1y/-_mava_DOWN |
| Ubac1    | -0.9890611 | 0.04173617 | Mtm1y/-_mava_DOWN |
| Fn3k     | -1.0063893 | 0.00833012 | Mtm1y/-_mava_DOWN |
| Hspb2    | -1.0087517 | 0.01093519 | Mtm1y/-_mava_DOWN |
| Cops3    | -1.0104566 | 0.01152397 | Mtm1y/-_mava_DOWN |
| Fhl3     | -1.0150386 | 0.00950415 | Mtm1y/-_mava_DOWN |
| Cops4    | -1.0169514 | 0.01248175 | Mtm1y/-_mava_DOWN |
| Pdlim5   | -1.0177285 | 0.01054988 | Mtm1y/-_mava_DOWN |
| Vcp      | -1.0232826 | 0.02838532 | Mtm1y/-_mava_DOWN |
| Cops8    | -1.0261863 | 0.00584585 | Mtm1y/-_mava_DOWN |
| Fabp3    | -1.0406891 | 0.0437162  | Mtm1y/-_mava_DOWN |

|        |            |            |                   |
|--------|------------|------------|-------------------|
| Npepl1 | -1.0481743 | 0.02722259 | Mtm1y/-_mava_DOWN |
| Bag2   | -1.0660885 | 0.02928864 | Mtm1y/-_mava_DOWN |
| Alpk2  | -1.0672718 | 0.01595423 | Mtm1y/-_mava_DOWN |
| Gstm7  | -1.0881559 | 0.02316214 | Mtm1y/-_mava_DOWN |
| Pdlim5 | -1.1045952 | 0.02673023 | Mtm1y/-_mava_DOWN |
| Actn2  | -1.1391294 | 0.01248175 | Mtm1y/-_mava_DOWN |
| Ldhb   | -1.1399933 | 0.0302593  | Mtm1y/-_mava_DOWN |
| Ces1d  | -1.1569382 | 0.03497321 | Mtm1y/-_mava_DOWN |
| Gnpda1 | -1.1608801 | 0.01522854 | Mtm1y/-_mava_DOWN |
| Tmod1  | -1.1865785 | 0.03181426 | Mtm1y/-_mava_DOWN |
| Nat14  | -1.2149064 | 0.03682364 | Mtm1y/-_mava_DOWN |
| Pm20d2 | -1.2327675 | 0.01035752 | Mtm1y/-_mava_DOWN |
| Myoz2  | -1.2461814 | 0.03698361 | Mtm1y/-_mava_DOWN |
| Klhl34 | -1.2527393 | 0.00950415 | Mtm1y/-_mava_DOWN |
| Lrrc30 | -1.2604287 | 0.02141517 | Mtm1y/-_mava_DOWN |
| Vwa1   | -1.2624587 | 0.02155407 | Mtm1y/-_mava_DOWN |
| Gsta4  | -1.2735164 | 0.03399526 | Mtm1y/-_mava_DOWN |
| Syp    | -1.2893228 | 0.02677563 | Mtm1y/-_mava_DOWN |
| Nt5c1a | -1.3048855 | 0.00147399 | Mtm1y/-_mava_DOWN |
| Myl3   | -1.3074849 | 0.0180655  | Mtm1y/-_mava_DOWN |
| Col6a6 | -1.3079085 | 0.0466877  | Mtm1y/-_mava_DOWN |
| Alad   | -1.3125715 | 0.00906033 | Mtm1y/-_mava_DOWN |
| Grb14  | -1.3235143 | 0.02413123 | Mtm1y/-_mava_DOWN |
| Cnot9  | -1.3569296 | 0.03079169 | Mtm1y/-_mava_DOWN |
| H2az1  | -1.3607109 | 0.03938264 | Mtm1y/-_mava_DOWN |
| Myom3  | -1.3627411 | 0.01563767 | Mtm1y/-_mava_DOWN |
| Oplah  | -1.3692418 | 0.00147399 | Mtm1y/-_mava_DOWN |
| Xdh    | -1.3758719 | 0.04173617 | Mtm1y/-_mava_DOWN |
| Cped1  | -1.3863998 | 0.00095756 | Mtm1y/-_mava_DOWN |
| Mybpc1 | -1.3883842 | 0.00192989 | Mtm1y/-_mava_DOWN |
| Ugp2   | -1.3891676 | 0.00119838 | Mtm1y/-_mava_DOWN |
| Ttn    | -1.396438  | 0.00204997 | Mtm1y/-_mava_DOWN |

|         |            |            |                   |
|---------|------------|------------|-------------------|
| Aqp7    | -1.4175692 | 0.03267914 | Mtm1y/-_mava_DOWN |
| Lsmem1  | -1.4467675 | 0.0072178  | Mtm1y/-_mava_DOWN |
| Tpm3    | -1.5133516 | 0.03953035 | Mtm1y/-_mava_DOWN |
| Nrbp1   | -1.5167809 | 0.03953035 | Mtm1y/-_mava_DOWN |
| Map2k6  | -1.5482023 | 0.00982993 | Mtm1y/-_mava_DOWN |
| Atp2a2  | -1.5864356 | 0.01208193 | Mtm1y/-_mava_DOWN |
| Srrm2   | -1.595482  | 0.03286073 | Mtm1y/-_mava_DOWN |
| Atp5mc2 | -1.6322999 | 0.04047612 | Mtm1y/-_mava_DOWN |
| Atp2a2  | -1.6919424 | 0.03399526 | Mtm1y/-_mava_DOWN |
| Rspo3   | -1.7062566 | 0.04173617 | Mtm1y/-_mava_DOWN |
| Erfe    | -1.7344053 | 0.00095756 | Mtm1y/-_mava_DOWN |
| Myh6    | -1.895332  | 0.01110058 | Mtm1y/-_mava_DOWN |
| Lrrc39  | -1.9294294 | 0.01250683 | Mtm1y/-_mava_DOWN |
| Apobec2 | -2.0221794 | 0.00095756 | Mtm1y/-_mava_DOWN |
| Myl10   | -2.0405972 | 0.03731563 | Mtm1y/-_mava_DOWN |
| Zfp174  | -2.0526846 | 0.02046927 | Mtm1y/-_mava_DOWN |
| Mgst1   | -2.068683  | 0.00095756 | Mtm1y/-_mava_DOWN |
| Ppat    | -2.0808673 | 0.00252465 | Mtm1y/-_mava_DOWN |
| Bdh1    | -2.109684  | 0.00568557 | Mtm1y/-_mava_DOWN |
| Myh7    | -2.5644221 | 0.00536538 | Mtm1y/-_mava_DOWN |
| Myl2    | -2.632382  | 0.00950415 | Mtm1y/-_mava_DOWN |
| Map2k1  | -2.6664633 | 0.04173617 | Mtm1y/-_mava_DOWN |
| Tnnt1   | -2.6797269 | 0.00250245 | Mtm1y/-_mava_DOWN |
| Tnni1   | -2.7446772 | 0.00833456 | Mtm1y/-_mava_DOWN |
| Fxyd6   | -2.7938585 | 0.04491479 | Mtm1y/-_mava_DOWN |
| Myl2    | -2.800589  | 0.00192983 | Mtm1y/-_mava_DOWN |
| Selenop | -2.8875676 | 0.02945975 | Mtm1y/-_mava_DOWN |
| Mtcl2   | -3.2950653 | 0.03938264 | Mtm1y/-_mava_DOWN |
| Myom1   | -4.4294227 | 0.00095756 | Mtm1y/-_mava_DOWN |

**Table S5: Mouse global untargeted proteomics analysis (Enrichment GO analysis with mava treatment)**

| Enrichment FDR | nGenes | Pathway Genes | Fold Enrichment | Pathway                                           | direction       |
|----------------|--------|---------------|-----------------|---------------------------------------------------|-----------------|
| 4.20E-10       | 20     | 423           | 7.41374394      | GO:0003012 muscle system proc.                    | Maintained_MAVA |
| 4.20E-10       | 18     | 312           | 8.63787375      | GO:0006936 muscle contraction                     | Maintained_MAVA |
| 1.77E-06       | 12     | 172           | 9.17107584      | GO:0006941 striated muscle contraction            | Maintained_MAVA |
| 1.99E-05       | 23     | 3211          | 3.39002268      | GO:0003008 system proc.                           | Maintained_MAVA |
| 2.85E-05       | 11     | 249           | 7.82703886      | GO:0003015 heart proc.                            | Maintained_MAVA |
| 8.96E-05       | 9      | 131           | 9.28571429      | GO:0060048 cardiac muscle contraction             | Maintained_MAVA |
| 0.00013369     | 10     | 237           | 7.45840505      | GO:0060047 heart contraction                      | Maintained_MAVA |
| 0.00015742     | 6      | 50            | 16.8831169      | GO:0014888 striated muscle adaptation             | Maintained_MAVA |
| 0.00015742     | 6      | 69            | 16.8831169      | GO:0055008 cardiac muscle tissue morphogenesis    | Maintained_MAVA |
| 0.00016799     | 13     | 518           | 5.02976191      | GO:0008015 blood circulation                      | Maintained_MAVA |
| 0.00026748     | 13     | 547           | 4.76190476      | GO:0003013 circulatory system proc.               | Maintained_MAVA |
| 0.00026748     | 4      | 8             | 35.3741497      | GO:0014883 transition between fast and slow fiber | Maintained_MAVA |
| 0.00026748     | 6      | 80            | 14.8571429      | GO:0060415 muscle tissue morphogenesis            | Maintained_MAVA |
| 0.0002771      | 5      | 29            | 20.6349206      | GO:0002026 reg. of the force of heart contraction | Maintained_MAVA |
| 0.0002771      | 6      | 88            | 14.2857143      | GO:0048644 muscle organ morphogenesis             | Maintained_MAVA |

|            |    |     |            |                                                            |                 |
|------------|----|-----|------------|------------------------------------------------------------|-----------------|
| 0.00034954 | 5  | 25  | 19.3452381 | GO:0043501 skeletal muscle adaptation                      | Maintained_MAVA |
| 0.00034954 | 5  | 53  | 19.3452381 | GO:0055010 ventricular cardiac muscle tissue morphogenesis | Maintained_MAVA |
| 0.00036845 | 6  | 45  | 13.2653061 | GO:0003009 skeletal muscle contraction                     | Maintained_MAVA |
| 0.00059836 | 5  | 63  | 17.1957672 | GO:0003229 ventricular cardiac muscle tissue development   | Maintained_MAVA |
| 0.00061084 | 4  | 12  | 27.5132275 | GO:0014733 reg. of skeletal muscle adaptation              | Maintained_MAVA |
| 0.00072562 | 5  | 77  | 16.2907268 | GO:0003208 cardiac ventricle morphogenesis                 | Maintained_MAVA |
| 0.00079593 | 6  | 59  | 11.2554113 | GO:0050879 multicellular organismal movement               | Maintained_MAVA |
| 0.00079593 | 6  | 59  | 11.2554113 | GO:0050881 musculoskeletal movement                        | Maintained_MAVA |
| 0.00147204 | 8  | 247 | 6.6031746  | GO:0048738 cardiac muscle tissue development               | Maintained_MAVA |
| 0.00189061 | 8  | 265 | 6.34920635 | GO:0014706 striated muscle tissue development              | Maintained_MAVA |
| 0.00230927 | 7  | 163 | 7.34463277 | GO:0006937 reg. of muscle contraction                      | Maintained_MAVA |
| 0.00430925 | 3  | 7   | 30.952381  | GO:0003010 voluntary skeletal muscle contraction           | Maintained_MAVA |
| 0.00430925 | 3  | 7   | 30.952381  | GO:0014721 twitch skeletal muscle contraction              | Maintained_MAVA |
| 0.00430925 | 4  | 23  | 16.5079365 | GO:0046040 IMP metabolic proc.                             | Maintained_MAVA |
| 0.00430925 | 10 | 445 | 4.32900433 | GO:0060537 muscle tissue development                       | Maintained_MAVA |
| 0.00443236 | 5  | 135 | 10.6732348 | GO:0003206 cardiac chamber morphogenesis                   | Maintained_MAVA |
| 0.00590389 | 6  | 125 | 7.58017493 | GO:0043500 muscle adaptation                               | Maintained_MAVA |
| 0.00680194 | 5  | 136 | 9.67261905 | GO:0003231 cardiac ventricle development                   | Maintained_MAVA |

|            |    |     |            |                                                                |                 |
|------------|----|-----|------------|----------------------------------------------------------------|-----------------|
| 0.00782199 | 4  | 29  | 13.7566138 | GO:0046033 AMP metabolic proc.                                 | Maintained_MAVA |
| 0.00810599 | 8  | 203 | 4.95238095 | GO:0055001 muscle cell development                             | Maintained_MAVA |
| 0.00906878 | 3  | 25  | 23.2142857 | GO:0003299 muscle hypertrophy in response to stress            | Maintained_MAVA |
| 0.00906878 | 5  | 101 | 8.84353742 | GO:0003300 cardiac muscle hypertrophy                          | Maintained_MAVA |
| 0.00906878 | 3  | 26  | 23.2142857 | GO:0014887 cardiac muscle adaptation                           | Maintained_MAVA |
| 0.00048529 | 16 | 224 | 4.24489796 | GO:0009260 ribonucleotide biosynthetic proc.                   | lost_MAVA       |
| 0.00048529 | 11 | 70  | 6.48526077 | GO:0015986 proton motive force-driven ATP synthesis            | lost_MAVA       |
| 0.00053624 | 16 | 231 | 4.12698413 | GO:0046390 ribose phosphate biosynthetic proc.                 | lost_MAVA       |
| 0.00065229 | 7  | 28  | 10.8333333 | GO:0006120 mitochondrial electron transport NADH to ubiquinone | lost_MAVA       |
| 0.00065229 | 15 | 230 | 4.06673618 | GO:0006164 purine nucleotide biosynthetic proc.                | lost_MAVA       |
| 0.00065229 | 15 | 210 | 4.18904404 | GO:0009152 purine ribonucleotide biosynthetic proc.            | lost_MAVA       |
| 0.00065229 | 16 | 285 | 3.83410138 | GO:0009165 nucleotide biosynthetic proc.                       | lost_MAVA       |
| 0.00065229 | 16 | 288 | 3.83410138 | GO:1901293 nucleoside phosphate biosynthetic proc.             | lost_MAVA       |
| 0.0008312  | 12 | 124 | 4.89795918 | GO:0009201 ribonucleoside triphosphate biosynthetic proc.      | lost_MAVA       |
| 0.0008312  | 15 | 241 | 3.95136778 | GO:0072522 purine-containing compound biosynthetic proc.       | lost_MAVA       |
| 0.00120648 | 12 | 135 | 4.69172932 | GO:0009142 nucleoside triphosphate biosynthetic proc.          | lost_MAVA       |
| 0.00141987 | 13 | 143 | 4.23558897 | GO:0006119 oxidative phosphorylation                           | lost_MAVA       |

|            |    |     |            |                                                                   |           |
|------------|----|-----|------------|-------------------------------------------------------------------|-----------|
| 0.00146961 | 11 | 107 | 4.86394558 | GO:0006754 ATP biosynthetic proc.                                 | lost_MAVA |
| 0.00146961 | 12 | 144 | 4.45714286 | GO:0009199 ribonucleoside triphosphate metabolic proc.            | lost_MAVA |
| 0.00146961 | 9  | 59  | 6.07792208 | GO:0010257 NADH dehydrogenase complex assembly                    | lost_MAVA |
| 0.00146961 | 11 | 105 | 4.86394558 | GO:0022904 respiratory electron transport chain                   | lost_MAVA |
| 0.00146961 | 9  | 59  | 6.07792208 | GO:0032981 mitochondrial respiratory chain complex I assembly     | lost_MAVA |
| 0.00188272 | 11 | 118 | 4.69622332 | GO:0009206 purine ribonucleoside triphosphate biosynthetic proc.  | lost_MAVA |
| 0.00197234 | 11 | 119 | 4.64285714 | GO:0009145 purine nucleoside triphosphate biosynthetic proc.      | lost_MAVA |
| 0.00197234 | 9  | 67  | 5.7635468  | GO:0019646 aerobic electron transport chain                       | lost_MAVA |
| 0.00219738 | 14 | 445 | 3.63636364 | GO:0060537 muscle tissue development                              | lost_MAVA |
| 0.00311275 | 12 | 169 | 4.01544402 | GO:0009141 nucleoside triphosphate metabolic proc.                | lost_MAVA |
| 0.00311275 | 17 | 340 | 3.00680272 | GO:0015980 energy derivation by oxidation of organic compounds    | lost_MAVA |
| 0.00360125 | 11 | 136 | 4.25595238 | GO:0009205 purine ribonucleoside triphosphate metabolic proc.     | lost_MAVA |
| 0.00360125 | 9  | 78  | 5.22321429 | GO:0042775 mitochondrial ATP synthesis coupled electron transport | lost_MAVA |
| 0.0037575  | 11 | 131 | 4.21207658 | GO:0022900 electron transport chain                               | lost_MAVA |
| 0.00393424 | 8  | 197 | 5.82633053 | GO:0098739 import across plasma membrane                          | lost_MAVA |
| 0.00450081 | 11 | 144 | 4.08571429 | GO:0009144 purine nucleoside triphosphate metabolic proc.         | lost_MAVA |

|            |    |      |            |                                               |           |
|------------|----|------|------------|-----------------------------------------------|-----------|
| 0.00591935 | 13 | 197  | 3.42451874 | GO:0009060 aerobic respiration                | lost_MAVA |
| 0.00640615 | 18 | 560  | 2.67428571 | GO:0090407 organophosphate biosynthetic proc. | lost_MAVA |
| 0.00819867 | 20 | 1131 | 2.45167374 | GO:0034220 ion transmembrane transport        | lost_MAVA |
| 0.00922772 | 4  | 24   | 13.5064935 | GO:0010884 positive reg. of lipid storage     | lost_MAVA |

**Supplemental Figure 1: Myosin biochemical states in relation to fibre types in human XLMTM.**

(A) represents the proportion of myosin molecules in the DRX state (P1) whilst (B) is the number of myosin heads in the SRX state (P2) for all patients. Note that data are separated according to fibre types (slow vs fast twitch fibres). Circles are individual muscle fibres from three controls and three patients.

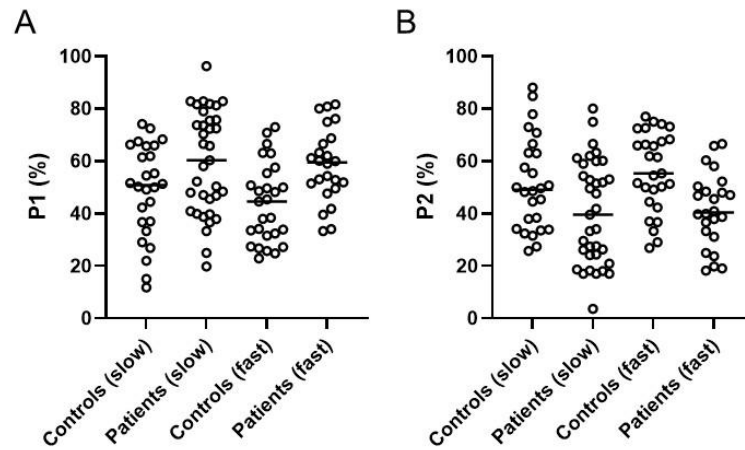

Supplement: sd1 [file 1]
